# Supplementary material for: Sequence of Volcanic Activity of Sakurajima Volcano, Japan, as Revealed by Non-Eruptive Deflation
Source: Frontiers journal article supplement (doi:10.3389/feart.2022.727909), 2022-03-07
Supplement: Data_Sheet_1.XLSX [file Data_Sheet_1.XLSX]

## Sheet: All
Episode	Type	Date & time	Strain change (Radial)	Strain change (Tangential)	Volume change of pressure source
			10-9 strain	10-9 strain	m3
1	Ex	2017-10-30 06:14:00	21.8231	-12.4314	587.911
1	Er	2017-10-31 12:21:00	4.48177	-2.97805	162.489
1	NED	2017-11-01 10:50:00	7.1	-11.8947	1275.33
1	NED	2017-11-02 08:50:00	5.0187	-6.72081	629.745
1	NED	2017-11-06 15:13:00	7.39429	-6.54197	455.132
1	NED	2017-11-07 01:39:00	10.3012	-5.66828	259.286
1	NED	2017-11-07 05:08:00	5.3768	-6.52539	573.009
1	Ex	2017-11-07 10:25:00	15.9034	-10.7873	599.548
1	NED	2017-11-07 11:53:00	8.73117	-6.52565	394.865
1	Ex	2017-11-13 22:07:00	125.553	-122.049	9136.74
1	NED	2017-11-14 08:21:00	11.8499	-7.32652	374.263
1	Er	2017-11-14 09:55:00	26.2217	-20.3553	1272.11
1	NED	2017-11-14 10:42:00	12.2796	-9.93903	643.237
1	Ex	2017-11-14 23:43:00	7.56941	-5.8743	367.026
1	NED	2017-11-15 00:15:00	6.79748	-6.48439	478.486
1	Ex	2017-11-16 08:50:00	5.86621	-3.03445	130.663
1	NED	2017-11-16 10:02:00	4.82338	-6.9223	677.477
1	NED	2017-11-27 09:55:00	6.28766	-5.49963	379.139
1	NED	2017-11-27 13:05:00	7.282	-5.10907	292.602
1	Ex	2017-11-27 16:37:00	6.38522	-6.61816	519.81
1	NED	2017-11-28 04:45:00	5.20774	-6.69228	610.519
1	NED	2017-11-30 16:15:00	3.87126	-7.48516	866.415
1	NED	2017-11-30 22:44:00	5.74055	-8.68721	877.987
1	NED	2017-12-01 16:26:00	6.38424	-6.36753	486.024
1	NED	2017-12-01 20:09:00	10.0642	-7.17461	416.696
1	NED	2017-12-02 00:05:00	8.54491	-5.13408	255.365
1	NED	2017-12-02 00:58:00	5.52669	-6.33978	535.536
1	NED	2017-12-02 02:55:00	5.27337	-6.57048	587.271
1	NED	2017-12-02 07:16:00	6.45077	-5.40031	359.332
1	NED	2017-12-02 14:02:00	5.06587	-5.59896	460.705
1	NED	2017-12-02 16:28:00	6.27654	-7.82935	700.324
1	NED	2017-12-03 11:56:00	37.8391	-23.4551	1201.02
1	Er	2017-12-04 18:45:00	40.4885	-25.4574	1320.8
	NED	2017-12-08 14:21:00	8.36875	-6.24508	377.385
	NED	2017-12-08 22:19:00	6.76359	-9.0175	842.549
	NED	2017-12-09 09:36:00	10.0415	-7.74494	481.391
	NED	2017-12-10 06:58:00	8.49206	-7.26336	491.795
	NED	2017-12-11 13:08:00	7.35041	-5.44984	327.504
	NED	2017-12-12 00:04:00	10.1099	-7.38451	438.067
	NED	2017-12-12 02:07:00	8.39658	-8.48463	653.977
	NED	2017-12-12 10:15:00	6.35846	-5.24214	344.458
	NED	2017-12-12 12:48:00	8.95698	-6.0496	334.95
	NED	2017-12-12 15:18:00	5.65945	-5.36173	393.555
	NED	2017-12-14 05:52:00	7.88957	-9.14537	778.176
	NED	2017-12-14 12:23:00	7.46709	-9.06878	796.741
	NED	2017-12-14 14:05:00	5.05926	-5.38662	431.478
	NED	2017-12-15 00:47:00	15.2158	-8.83598	425.601
	NED	2017-12-15 18:31:00	5.43416	-6.26833	531.554
	NED	2017-12-15 20:14:00	6.53259	-6.56452	503.883
	NED	2017-12-15 21:10:00	5.91129	-7.34094	654.683
	NED	2017-12-15 22:07:00	6.9595	-6.68183	495.495
	NED	2017-12-16 00:12:00	9.08868	-5.89024	314.194
	NED	2017-12-16 01:49:00	7.24075	-6.16376	415.742
	NED	2017-12-16 02:23:00	6.75575	-5.51467	359.414
	NED	2017-12-16 03:21:00	7.91895	-7.50764	551.365
	NED	2017-12-16 21:59:00	8.30646	-6.96529	464.088
	NED	2017-12-17 00:48:00	11.6514	-7.12226	360.003
	NED	2017-12-17 13:03:00	6.26701	-5.60884	393.796
	NED	2017-12-17 16:38:00	6.47967	-7.71349	668.489
	NED	2017-12-17 23:15:00	-0.06443	-5.90436
	NED	2017-12-18 00:09:00	9.01295	-7.5235	499.427
	NED	2017-12-18 04:09:00	6.311	-7.43591	639.902
	NED	2017-12-18 14:48:00	11.0696	-9.70923	670.834
	NED	2017-12-18 23:30:00	6.34852	-7.66469	670.68
	NED	2017-12-19 02:40:00	6.36301	-5.57571	384.946
	NED	2017-12-19 17:34:00	7.05225	-5.57818	354.152
	NED	2017-12-19 19:39:00	4.70634	-6.92541	688.227
	NED	2017-12-19 20:55:00	7.3068	-6.18344	415.08
	NED	2017-12-20 02:32:00	9.0565	-6.00057	326.555
	NED	2017-12-20 08:38:00	10.568	-7.69702	455.471
	NED	2017-12-20 09:56:00	8.57978	-7.60223	529.528
	NED	2017-12-20 17:12:00	4.53916	-6.931	704.241
	NED	2017-12-20 18:45:00	7.68817	-5.44456	314.384
	NED	2017-12-20 19:38:00	12.539	-10.1473	656.62
	NED	2017-12-20 23:29:00	6.81923	-6.2624	448.688
	NED	2017-12-21 02:39:00	6.91651	-5.83348	390.517
	NED	2017-12-21 03:27:00	6.29391	-6.98105	575.887
	NED	2017-12-21 06:00:00	6.82536	-8.12042	703.483
	NED	2017-12-21 18:13:00	33.0659	-24.3856	1458.71
	NED	2017-12-22 03:08:00	10.4348	-7.62052	452
	NED	2017-12-22 03:56:00	7.50918	-5.8221	363.477
	NED	2017-12-22 06:05:00	13.9397	-11.6634	775.724
	NED	2017-12-22 08:34:00	9.36469	-7.91157	530.356
	NED	2017-12-22 09:07:00	11.4525	-7.01862	355.611
	NED	2017-12-22 15:26:00	8.92187	-8.39603	613.095
	NED	2017-12-22 16:58:00	8.94167	-8.53285	629.815
	NED	2017-12-22 18:11:00	7.59718	-5.81119	358.661
	NED	2017-12-22 20:37:00	6.53942	-7.47408	629.738
	NED	2017-12-22 22:10:00	9.62133	-7.71229	495.119
	NED	2017-12-23 05:29:00	25.7025	-14.8459	711.441
	NED	2017-12-23 06:39:00	21.7678	-12.1284	561.527
	NED	2017-12-23 11:17:00	37.9728	-17.1688	714.732
	NED	2017-12-23 21:29:00	8.02761	-5.85507	346.901
	NED	2017-12-23 22:15:00	6.19661	-6.40649	502.25
	NED	2017-12-23 22:46:00	10.3693	-11.0551	886.4
	NED	2017-12-24 00:45:00	5.05777	-7.39372	731.831
	NED	2017-12-24 02:08:00	4.19892	-6.65374	690.949
	NED	2017-12-24 04:09:00	13.5964	-9.02501	491.956
	NED	2017-12-24 09:38:00	41.301	-28.5111	4966.66
	NED	2017-12-24 10:39:00	5.4886	-8.44332	861.692
	NED	2017-12-24 12:10:00	9.69612	-6.55054	362.771
	NED	2017-12-24 21:04:00	5.54979	-5.85753	466.226
	NED	2017-12-25 03:11:00	13.1846	-6.42438	274.435
	NED	2017-12-25 04:11:00	71.4226	-79.3149	6548.48
	NED	2017-12-25 05:51:00	14.0544	-8.88538	463.331
	NED	2017-12-25 06:39:00	7.28253	-6.27554	427.481
	NED	2017-12-25 07:25:00	8.12618	-6.07609	367.798
	NED	2017-12-25 09:31:00	7.57159	-5.2648	299.141
	NED	2017-12-25 11:20:00	15.3658	-12.637	828.685
	NED	2017-12-25 12:01:00	7.08778	-7.66767	621.32
	NED	2017-12-25 12:45:00	12.7684	-8.18453	432.217
	NED	2017-12-25 13:22:00	17.1212	-8.51569	356.375
	NED	2017-12-25 18:07:00	13.8049	-7.09689	303.724
	NED	2017-12-25 19:35:00	9.00866	-8.75111	654.768
	NED	2017-12-25 20:29:00	28.526	-15.0677	662.314
	NED	2017-12-26 03:07:00	6.28616	-7.37374	632.607
	NED	2017-12-26 10:43:00	12.5129	-5.38174	260.455
	NED	2017-12-26 11:20:00	8.39398	-7.65364	545.305
	NED	2017-12-26 12:59:00	8.71706	-6.36143	377.082
	NED	2017-12-26 13:49:00	6.09825	-8.14194	761.433
	NED	2017-12-26 14:43:00	10.8017	-10.4779	783.118
	NED	2017-12-26 16:28:00	6.93383	-7.60834	622.826
	NED	2017-12-26 17:11:00	12.297	-8.59209	490.29
	NED	2017-12-26 18:19:00	23.7809	-11.2319	494.997
	NED	2017-12-26 20:02:00	9.90124	-7.10159	414.661
	NED	2017-12-26 20:37:00	17.8376	-12.808	748.582
	NED	2017-12-26 21:17:00	17.1753	-12.1187	697.518
	NED	2017-12-27 00:01:00	13.1434	-10.8915	718.685
	NED	2017-12-27 01:42:00	14.5522	-23.3129	2436.23
	NED	2017-12-27 02:26:00	18.6584	-12.5396	691.194
	NED	2017-12-27 05:05:00	52.0325	-37.7934	1121.11
	NED	2017-12-27 06:14:00	12.6406	-7.12256	333.342
	NED	2017-12-27 12:38:00	14.1573	-10.2671	605.299
	NED	2017-12-27 17:31:00	38.7861	-22.9069	1159.26
	NED	2017-12-27 18:04:00	32.8093	-20.4779	1055.27
	NED	2017-12-27 18:31:00	42.4228	-24.3427	2197.15
	NED	2017-12-27 20:30:00	7.5048	-6.71903	471.875
	NED	2017-12-29 09:30:00	12.3368	-8.43266	471.91
	NED	2017-12-29 11:01:00	9.41234	-7.95454	533.385
	NED	2017-12-29 11:40:00	15.8356	-10.2116	542.218
	NED	2017-12-29 12:17:00	16.8316	-9.93882	486.34
	NED	2017-12-29 12:54:00	15.1584	-9.42923	484.397
	NED	2017-12-29 13:28:00	14.8123	-11.1369	677.343
	NED	2017-12-29 14:05:00	16.0149	-10.6275	579.169
	NED	2017-12-29 14:41:00	16.6926	-9.30692	431.173
	NED	2017-12-29 15:18:00	13.4084	-9.01837	497.457
	NED	2017-12-29 15:51:00	10.7717	-8.12499	495.523
	NED	2017-12-29 16:25:00	9.68949	-7.8814	512.157
	NED	2017-12-29 17:00:00	10.0293	-8.69025	594.599
	NED	2017-12-29 17:33:00	6.98246	-6.07039	416.456
	NED	2017-12-29 18:11:00	4.71354	-6.23305	579.32
	NED	2017-12-29 19:14:00	2.61793	-7.033	946.419
	NED	2017-12-29 19:59:00	10.7081	-6.75889	351.922
	NED	2017-12-29 20:42:00	10.5927	-6.92025	371.836
	NED	2017-12-29 21:14:00	10.6658	-5.7318	256.237
	NED	2017-12-29 22:56:00	8.89204	-7.11342	455.91
	NED	2017-12-29 23:40:00	9.43981	-7.34743	460.209
	NED	2017-12-30 01:27:00	7.25522	-7.82482	632.656
	NED	2017-12-30 02:42:00	8.01288	-6.0035	364.035
	NED	2017-12-30 04:07:00	8.19825	-6.11921	369.849
	NED	2017-12-30 05:21:00	8.83358	-7.39198	491.686
	NED	2017-12-30 08:27:00	10.2462	-7.37672	432.141
	NED	2017-12-30 19:28:00	9.96301	-7.34263	438.968
	NED	2017-12-30 20:55:00	9.60276	-5.08081	223.702
	NED	2017-12-30 22:51:00	5.08188	-6.24561	553.124
	NED	2017-12-31 04:44:00	29.8088	-29.1882	1885.66
	NED	2017-12-31 05:47:00	60.6683	-40.3058	2198.82
	NED	2017-12-31 09:00:00	37.9587	-13.9333	580.042
	NED	2017-12-31 10:13:00	94.2432	-58.5534	3004.67
	NED	2017-12-31 13:20:00	90.1298	-61.3731	3422.94
	NED	2017-12-31 15:34:00	119.627	-78.2337	4207.56
	NED	2017-12-31 19:05:00	119.826	-69.0541	3302.01
	NED	2018-01-01 01:11:00	88.5781	-50.2108	2363.45
	NED	2018-01-01 04:06:00	110.427	-68.0294	3463.61
	NED	2018-01-01 07:22:00	97.9937	-57.2385	2772.26
	NED	2018-01-01 08:38:00	25.8338	-10.1998	424.617
	NED	2018-01-01 16:33:00	37.1324	-33.0258	2307.29
	NED	2018-01-03 07:15:00	3.32666	-18.1743	3055.22
	NED	2018-01-05 00:56:00	2.62663	-6.64891	872.877
	NED	2018-01-05 05:40:00	60.3472	-56.2899	4082.33
2	Er	2018-01-06 17:44:00	17.05	-16.7836	1268.46
2	NED	2018-01-07 23:47:00	4.29666	-6.17186	604.363
2	NED	2018-01-08 03:25:00	29.3252	-21.7184	1303.89
2	Ex	2018-01-08 03:59:00	69.3225	-73.4243	5859.16
2	NED	2018-01-08 06:47:00	4.89427	-6.40848	591.83
2	NED	2018-01-08 09:21:00	15.2282	-12.3714	803.119
2	NED	2018-01-08 21:42:00	0.84838	-5.94807	1053.42
2	NED	2018-01-10 20:36:00	6.5213	-5.66192	388.018
2	Ex	2018-01-10 21:02:00	34.3994	-27.1511	1720.71
2	NED	2018-01-11 17:26:00	1.71885	-6.62774	1014.46
2	NED	2018-01-12 16:42:00	5.54219	-5.21019	380.157
2	NED	2018-01-12 21:28:00	5.92895	-6.64809	552.663
2	Ex	2018-01-13 02:41:00	18.7187	-10.1842	460.78
2	NED	2018-01-13 17:08:00	8.07852	-6.557	425.34
2	NED	2018-01-14 19:14:00	5.65651	-7.63651	719.262
2	NED	2018-01-14 22:02:00	13.6331	-6.58245	283.77
2	Ex	2018-01-15 06:08:00	8.30093	-6.35529	392.546
2	Er	2018-01-15 11:17:00	-	-	-
2	Er	2018-01-15 15:03:00	3.35637	-4.24601	383.366
2	NED	2018-01-16 00:49:00	11.2418	-6.33504	296.516
2	Ex	2018-01-16 04:03:00	14.9944	-18.5324	1647.51
2	NED	2018-01-16 06:29:00	5.88484	-7.46925	675.86
2	Ex	2018-01-16 07:49:00	11.8446	-12.5335	999.464
2	NED	2018-01-16 21:01:00	0.86036	-8.47322	1585.38
2	Ex	2018-01-17 01:45:00	45.4486	-37.9505	2519.92
2	NED	2018-01-17 06:30:00	40.2913	-38.9337	2901.39
2	NED	2018-01-17 07:00:00	8.2289	-11.4878	1105.17
2	Ex	2018-01-17 10:36:00	66.3239	-56.8981	3861.86
2	NED	2018-01-17 16:35:00	5.53336	-5.72608	449.215
2	NED	2018-01-18 02:06:00	5.65706	-5.75983	446.466
2	NED	2018-01-18 03:58:00	7.00385	-6.2515	437.985
2	Ex	2018-01-18 07:48:00	8.02371	-6.74926	450.842
2	Ex	2018-01-18 10:18:00	12.6715	-6.82678	305.935
2	Er	2018-01-18 10:24:00	87.1158	-89.1844	6941.1
2	Ex	2018-01-18 15:17:00	36.3257	-26.7925	1602.83
2	NED	2018-01-19 01:04:00	6.0671	-6.71769	553.471
2	NED	2018-01-19 01:46:00	3.69086	-7.93145	967.227
2	NED	2018-01-19 13:14:00	8.82414	-6.13481	348.527
2	Er	2018-01-21 14:29:00	46.6189	-42.1672	2985.41
	NED	2018-01-22 00:33:00	10.2104	-6.87715	379.827
	NED	2018-01-23 04:00:00	40.9798	-52.8407	4831.27
	NED	2018-01-23 20:26:00	14.1008	-12.0463	814.861
	NED	2018-01-25 07:19:00	8.85325	-5.2077	253.909
	NED	2018-01-29 05:44:00	1.52624	-7.92357	1315.99
	NED	2018-01-29 12:01:00	2.67906	-8.8973	1296.8
	NED	2018-02-03 06:33:00	6.4965	-5.05279	316.287
	NED	2018-02-05 16:01:00	8.12634	-8.15994	625.994
	NED	2018-02-06 18:28:00	7.0363	-5.76588	376.985
	NED	2018-02-06 19:20:00	6.75659	-6.36119	464.666
	NED	2018-02-06 21:05:00	8.70579	-7.09448	461.732
	NED	2018-02-07	6.4	-15.2	1940.67
3	Er	2018-02-11 22:01:00	21.299	-13.3962	695.244
3	NED	2018-02-12 20:45:00	37.4149	-40.3292	3259.36
3	NED	2018-02-12 23:06:00	3.29441	-5.81756	641.977
3	NED	2018-02-18 09:03:00	5.43951	-5.2008	384.441
3	Er	2018-02-18 19:47:00	-	-	-
3	Ex	2018-02-19 08:20:00	15.127	-11.4937	705.355
3	NED	2018-02-20 20:26:00	3.38584	-10.7992	1551.75
3	NED	2018-02-20 21:38:00	5.09811	-5.22736	407.312
3	NED	2018-02-21 15:43:00	3.74804	-6.78648	759.058
3	NED	2018-02-22 12:04:00	5.17557	-7.68606	768.07
3	NED	2018-02-24 06:54:00	8.23506	-6.11713	368.195
3	Er	2018-02-24 16:39:00	4.698	-2.88337	146.29
3	NED	2018-02-24 19:02:00	-1.71389	-11.2334
3	NED	2018-02-25 02:11:00	2.11429	-6.29326	881.598
3	NED	2018-02-25 03:41:00	1.67889	-11.3018	1986.12
3	NED	2018-02-25 14:36:00	9.92865	-7.10205	413.71
3	NED	2018-02-26 11:27:00	5.89696	-5.14468	353.941
3	Ex	2018-02-27 00:31:00	16.9006	-12.3175	729.314
3	NED	2018-02-27 14:26:00	5.09924	-5.48395	442.481
3	Ex	2018-02-28 09:13:00	11.4213	-10.6732	775.175
3	NED	2018-02-28 10:32:00	14.9542	-19.5015	1796.24
3	Ex	2018-02-28 10:37:00	17.2227	-15.8667	1139.65
3	NED	2018-02-28 19:06:00	5.99116	-6.16738	481.965
3	NED	2018-02-28 20:12:00	2.58025	-6.64696	879.099
3	NED	2018-02-28 22:31:00	7.40342	-8.6486	739.87
3	NED	2018-03-01 00:45:00	13.2641	-12.405	901.497
3	NED	2018-03-01 04:49:00	2.09325	-7.34901	1091.55
3	NED	2018-03-01 07:14:00	7.69857	-6.79496	471.836
3	NED	2018-03-01 16:26:00	1.68184	-6.60646	1016.97
3	NED	2018-03-01 20:53:00	9.83091	-5.94659	297.645
3	NED	2018-03-02 06:35:00	8.93376	-6.24596	356.605
3	NED	2018-03-02 07:46:00	5.79758	-5.95671	464.844
3	NED	2018-03-02 09:49:00	3.23568	-9.35621	1296.28
3	NED	2018-03-02 19:28:00	6.31393	-7.39773	634.157
3	NED	2018-03-03 03:29:00	10.161	-6.26248	318.972
3	NED	2018-03-04 10:38:00	5.22866	-5.5416	442.419
3	NED	2018-03-04 19:31:00	7.85808	-5.30119	293.205
3	NED	2018-03-04 23:30:00	7.31677	-7.27998	554.66
3	NED	2018-03-05 08:08:00	5.38443	-5.32816	404.284
3	Ex	2018-03-05 08:12:00	22.1868	-21.5737	1615.38
3	NED	2018-03-05 08:46:00	9.12935	-8.85682	662.021
3	NED	2018-03-05 19:41:00	4.92705	-6.04334	534.497
3	Ex	2018-03-05 20:26:00	17.4608	-13.574	849.344
3	NED	2018-03-05 21:00:00	4.21162	-7.64507	856.237
3	NED	2018-03-05 22:27:00	17.6635	-13.9238	881.482
3	NED	2018-03-06 00:59:00	5.8015	-6.42518	529.463
3	NED	2018-03-06 01:49:00	2.03783	-5.08747	663.95
3	NED	2018-03-06 04:22:00	5.71764	-7.48082	690.516
3	NED	2018-03-06 06:42:00	1.76181	-7.04937	1091.21
3	NED	2018-03-06 08:12:00	3.92995	-6.18389	639.537
3	NED	2018-03-06 12:52:00	5.88991	-5.24321	366.567
3	NED	2018-03-07 06:46:00	3.46512	-8.47959	1097.13
3	NED	2018-03-08 10:08:00	7.28593	-6.57069	464.116
3	Er	2018-03-08 19:34:00	-	-	-
3	Ex	2018-03-10 17:31:00	-	-	-
3	Ex	2018-03-10 23:12:00	5.85686	-8.20115	790.472
3	NED	2018-03-11 15:18:00	5.9445	-5.76291	430.525
3	Ex	2018-03-11 19:15:00	-	-	-
3	NED	2018-03-12 17:04:00	6.05068	-7.34956	645.758
3	NED	2018-03-12 20:38:00	10.7584	-9.91386	712.216
3	NED	2018-03-13 00:19:00	7.76703	-7.72453	588.333
3	NED	2018-03-13 02:30:00	13.5008	-8.8886	480.955
3	NED	2018-03-13 04:08:00	7.71258	-7.7464	594.38
3	NED	2018-03-13 04:51:00	10.2988	-9.97995	745.322
3	NED	2018-03-13 07:30:00	4.9108	-10.8514	1340.84
3	NED	2018-03-13 08:22:00	16.6	-10.5541	553.333
3	NED	2018-03-13 09:23:00	5.17079	-6.4181	572.188
3	Er	2018-03-13 11:13:00	10.0728	-8.51666	571.294
3	NED	2018-03-13 14:07:00	4.3797	-7.82065	868.229
3	NED	2018-03-13 14:58:00	6.8	-7.57606	626.667
3	Ex	2018-03-13 16:24:00	14.3372	-10.4536	619.171
3	Er	2018-03-13 16:47:00	6.16612	-9.64554	994.113
3	Er	2018-03-13 18:13:00	19.9211	-14.7658	887.109
3	Er	2018-03-13 18:59:00	14.2202	-13.0472	934.141
3	NED	2018-03-13 20:02:00	8.73191	-8.73071	667.645
3	NED	2018-03-13 21:23:00	8.63728	-8.57872	652.745
3	NED	2018-03-13 22:46:00	5.07042	-7.88996	810.673
3	NED	2018-03-13 23:36:00	5.2	-5.4	424.667
3	NED	2018-03-14 00:30:00	3.37287	-6.16101	692.326
3	NED	2018-03-14 02:39:00	4.92057	-5.7592	493.342
3	NED	2018-03-14 03:26:00	6.64234	-6.07365	433.695
3	NED	2018-03-14 04:16:00	10.4041	-9.19887	639.645
3	NED	2018-03-14 05:11:00	10.4211	-11.3618	925.831
3	NED	2018-03-14 05:42:00	22.547	-18.7799	1244.43
3	NED	2018-03-14 06:13:00	8.72389	-10.747	953.282
3	NED	2018-03-14 06:48:00	6.26043	-6.78276	550.207
3	NED	2018-03-14 08:21:00	4.59426	-8.22354	914.139
3	NED	2018-03-14 09:20:00	11.17	-16.4475	1635.33
3	NED	2018-03-14 10:49:00	11.8626	-11.0329	798.342
3	Er	2018-03-14 14:14:00	15.0518	-19.7809	1831.14
3	Er	2018-03-14 14:41:00	15.4017	-10.5707	593.716
3	NED	2018-03-14 15:36:00	10.0678	-7.08308	406.642
3	Er	2018-03-14 16:52:00	13.1085	-16.5655	1494.63
3	NED	2018-03-14 17:45:00	8.13224	-7.42082	529.044
3	NED	2018-03-14 19:25:00	8.00765	-11.4183	1113.05
3	NED	2018-03-14 21:38:00	2.66103	-7.38705	1007.25
3	NED	2018-03-14 23:02:00	6.02896	-14.8902	1934.28
3	Ex	2018-03-15 00:19:00	26.3768	-17.9586	1001.48
3	NED	2018-03-15 02:26:00	5.03814	-7.37712	730.918
3	Ex	2018-03-15 05:57:00	22.6107	-21.4933	1581.71
3	NED	2018-03-15 06:29:00	16.1813	-10.5379	564.594
3	NED	2018-03-15 08:04:00	11.3296	-6.54994	314.155
3	NED	2018-03-15 10:53:00	5.71834	-8.36624	828.506
3	NED	2018-03-15 12:28:00	8.2265	-7.79987	572.864
3	NED	2018-03-15 14:03:00	11.0722	-8.53387	530.107
3	NED	2018-03-15 15:16:00	5.7395	-14.3519	1874.33
3	NED	2018-03-15 16:05:00	10.8445	-8.52537	538.493
3	NED	2018-03-15 17:06:00	9.11235	-9.00137	682.096
3	NED	2018-03-15 20:50:00	8.1503	-6.68121	436.964
3	Ex	2018-03-17 01:28:00	-	-	-
3	NED	2018-03-17 03:19:00	11.5339	-7.74118	426.197
3	NED	2018-03-17 04:10:00	7.16015	-10.5459	1048.6
3	NED	2018-03-17 06:51:00	10.0063	-8.14087	529.112
3	NED	2018-03-17 08:20:00	5.27092	-14.5603	1981.47
3	NED	2018-03-17 12:52:00	10.0635	-10.4324	819.5
3	NED	2018-03-17 15:22:00	14.0728	-9.58034	534.201
3	NED	2018-03-17 16:31:00	5.32643	-7.30681	695.237
3	NED	2018-03-18 01:02:00	3.4906	-9.96525	1373.85
3	Ex	2018-03-18 02:18:00	-0.64535	-2.14239
3	NED	2018-03-18 05:05:00	11.4252	-14.9855	1385.46
3	NED	2018-03-18 10:56:00	6.52254	-6.86233	544.933
3	Ex	2018-03-18 14:39:00	-	-	-
3	NED	2018-03-18 16:33:00	9.95091	-8.03608	519.109
3	NED	2018-03-18 18:06:00	1.53008	-10.4155	1834.32
3	Ex	2018-03-18 19:21:00	18.5999	-15.0396	972.524
3	Ex	2018-03-18 19:46:00	15.0313	-9.56552	501.808
3	NED	2018-03-18 23:43:00	7.15347	-9.74156	922.61
3	NED	2018-03-19 07:42:00	25.6717	-23.6461	1698.15
3	NED	2018-03-19 11:49:00	7.30066	-6.83164	496.682
3	NED	2018-03-19 12:43:00	10.8123	-8.24987	508.094
3	NED	2018-03-19 14:17:00	0.2168	-8.79012	1833.19
3	NED	2018-03-19 17:13:00	6.97745	-7.45318	598.428
3	NED	2018-03-19 17:46:00	7.91989	-9.79489	871.126
3	NED	2018-03-19 18:47:00	4.50498	-11.3891	1494.37
3	NED	2018-03-19 20:43:00	5.33588	-7.28989	691.833
3	NED	2018-03-19 21:19:00	8.26108	-5.61377	312.521
3	NED	2018-03-19 23:18:00	6.00486	-6.90323	584.014
3	Ex	2018-03-20 02:20:00	6.02674	-7.95321	738.216
3	NED	2018-03-20 05:31:00	9.04424	-9.44787	746.347
3	NED	2018-03-20 06:03:00	8.76674	-8.49659	634.615
3	NED	2018-03-20 12:10:00	8.79841	-8.07391	578.14
3	NED	2018-03-20 16:44:00	6.74499	-6.80977	524.54
3	NED	2018-03-20 19:15:00	6.07296	-6.38794	507.182
3	NED	2018-03-20 21:54:00	5.79235	-7.97889	761.171
3	NED	2018-03-20 23:26:00	2.12531	-10.6458	1752.62
3	NED	2018-03-21 01:06:00	5.15497	-8.38955	884.681
3	Ex	2018-03-21 01:38:00	24.9379	-11.2072	519.079
3	NED	2018-03-21 04:14:00	14	-12.7678	910
3	NED	2018-03-21 04:45:00	9.04369	-8.54808	626.315
3	NED	2018-03-21 05:48:00	7.50359	-7.56698	582.368
3	NED	2018-03-21 07:28:00	9.2	-8.35	592.667
3	NED	2018-03-21 10:46:00	10.1	-7.6	462.667
3	NED	2018-03-21 13:04:00	4.08349	-6.35572	653.124
3	NED	2018-03-21 16:33:00	3.9364	-5.74472	568.027
3	Ex	2018-03-21 17:58:00	30.49	-23.3909	1447.27
3	NED	2018-03-21 18:35:00	6.61993	-9.52225	933.235
3	NED	2018-03-21 19:27:00	7.88646	-7.79733	591.254
3	NED	2018-03-21 21:04:00	2.74546	-8.28038	1165.72
3	NED	2018-03-22 14:59:00	4.91868	-5.89352	513.04
3	NED	2018-03-22 18:59:00	3.701	-9.25139	1208.03
3	NED	2018-03-23 00:12:00	9.63411	-5.88053	296.834
3	NED	2018-03-23 02:08:00	6.74208	-5.29863	334.593
3	NED	2018-03-23 02:43:00	6.20004	-5.85116	428.198
3	NED	2018-03-23 04:41:00	3.62693	-5.97959	635.206
3	Er	2018-03-23 05:24:00	-	-	-
3	NED	2018-03-23 06:06:00	7.63237	-14.4455	1653.79
3	NED	2018-03-23 08:36:00	5.88148	-5.83521	443.628
3	NED	2018-03-23 11:40:00	5.43725	-7.3566	693.867
3	Er	2018-03-23 13:35:00	3.17231	-4.5023	437.61
3	Er	2018-03-23 15:35:00	-	-	-
3	NED	2018-03-23 16:25:00	8.19316	-8.05472	608.158
3	NED	2018-03-23 17:11:00	8.51312	-6.99731	458.646
3	Er	2018-03-23 20:59:00	5.09758	-17.627	2604.88
3	Ex	2018-03-23 22:29:00	4.49831	-6.55955	648.282
3	NED	2018-03-24 00:27:00	5.45101	-6.18806	518.913
3	NED	2018-03-24 01:27:00	8.05967	-6.97377	476.614
3	Er	2018-03-24 01:42:00	15.6072	-11.1221	645.761
3	NED	2018-03-24 05:57:00	9.85507	-8.23081	546.616
3	NED	2018-03-24 11:41:00	9.60248	-9.15832	675.691
3	Ex	2018-03-24 13:34:00	11.478	-10.4598	744.918
3	NED	2018-03-24 19:07:00	5.3605	-7.85235	778.198
3	NED	2018-03-24 19:54:00	7.31422	-6.34549	434.596
3	NED	2018-03-24 23:39:00	8.13547	-7.52736	542.484
3	NED	2018-03-25 06:07:00	6.51917	-8.49712	782.386
3	Er	2018-03-25 10:40:00	-	-	-
3	Er	2018-03-25 11:25:00	1.10691	-5.39608	882.291
3	NED	2018-03-25 11:55:00	8.55546	-5.6141	302.867
3	Er	2018-03-25 13:30:00	2.82163	-5.67341	669.804
3	Er	2018-03-25 15:34:00	7.60743	-7.1534	522.036
3	Er	2018-03-25 16:46:00	10.0687	-7.86839	494.508
3	Er	2018-03-25 17:34:00	0.18679	-6.70711	1392.28
3	Er	2018-03-25 18:33:00	5.2914	-7.13834	672.025
3	Er	2018-03-25 19:19:00	14.2233	-10.6366	643.939
3	Ex	2018-03-26 02:28:00	26.113	-21.3118	1388.77
3	NED	2018-03-26 03:45:00	14.9906	-8.52629	402.64
3	Er	2018-03-26 09:26:00	11.5468	-13.2842	1124.44
3	NED	2018-03-26 12:18:00	3.58163	-6.69548	761.611
3	NED	2018-03-26 13:57:00	3.13614	-9.0923	1260.99
3	Ex	2018-03-26 15:06:00	16.1639	-11.0205	615.329
3	Ex	2018-03-26 15:41:00	41.5382	-38.7008	2804.19
3	NED	2018-03-26 17:46:00	7.75457	-9.40765	825.901
3	NED	2018-03-26 19:41:00	6.7997	-11.0255	1160.19
3	NED	2018-03-26 20:29:00	13.9283	-6.25686	289.916
3	NED	2018-03-26 21:26:00	5.5172	-7.47798	706.111
3	NED	2018-03-26 22:15:00	5.96229	-5.16931	353.859
3	NED	2018-03-27 01:09:00	8.23511	-5.2876	279.664
3	NED	2018-03-27 04:36:00	3.06371	-5.47277	607.694
3	NED	2018-03-27 05:23:00	1.66792	-6.7505	1048.53
3	NED	2018-03-27 06:45:00	1.47638	-8.84918	1518.7
3	NED	2018-03-27 07:58:00	3.46676	-5.91552	640.627
3	Ex	2018-03-27 08:32:00	26.9929	-25.655	1887.75
3	NED	2018-03-27 17:24:00	6.13194	-7.00883	590.566
3	NED	2018-03-28 00:05:00	6.96142	-5.90195	396.773
3	Er	2018-03-28 03:03:00	14.7878	-13.303	937.802
3	NED	2018-03-28 05:50:00	6.88385	-6.2004	437.534
3	NED	2018-03-28 06:25:00	5.13707	-6.36316	566.51
3	NED	2018-03-28 07:16:00	9.25438	-5.93881	313.95
3	Ex	2018-03-28 10:24:00	24.9491	-22.8998	1640.05
3	Ex	2018-03-28 21:10:00	18.8481	-11.8363	734.85
3	NED	2018-03-29 02:37:00	-0.57279	-8.40633
3	NED	2018-03-29 04:30:00	6.12495	-5.89121	437.47
3	NED	2018-03-29 05:21:00	7.66969	-5.81545	356.255
3	Er	2018-03-29 08:09:00	5.47619	-10.7533	1254.54
3	Ex	2018-03-29 08:57:00	14.3819	-18.9618	1758.99
3	NED	2018-03-29 12:02:00	7.94207	-10.7053	1007.3
3	NED	2018-03-29 18:56:00	5.93044	-10.2814	1123.24
3	Ex	2018-03-29 19:58:00	-	-	-
3	NED	2018-03-29 20:05:00	2.39222	-5.94615	774.557
3	NED	2018-03-29 23:25:00	4.76452	-12.374	1642.11
3	NED	2018-03-30 11:05:00	6.29419	-6.705	537.289
3	Ex	2018-03-30 12:29:00	3.32064	-3.07	221.114
3	NED	2018-03-30 13:18:00	4.91077	-6.34118	580.322
3	NED	2018-03-30 16:39:00	4.91752	-5.97409	524.961
3	NED	2018-03-30 18:16:00	3.92764	-8.77484	1089.81
3	NED	2018-03-30 20:32:00	3.37732	-9.37151	1277.63
3	NED	2018-03-30 21:42:00	5.90317	-6.90812	591.692
3	NED	2018-03-31 01:15:00	6.19195	-8.01624	734.859
3	NED	2018-03-31 02:43:00	4.62592	-13.1449	1808.92
3	NED	2018-03-31 06:49:00	9.78414	-7.44486	457.443
3	NED	2018-03-31 11:05:00	2.41307	-11.7759	1925.95
3	Ex	2018-03-31 13:21:00	33.1046	-27.3526	1800.57
3	NED	2018-03-31 15:47:00	4.57884	-5.09936	421.874
3	Ex	2018-03-31 21:36:00	20.9991	-14.1556	782.402
3	NED	2018-03-31 22:45:00	11.0925	-6.51165	316.877
3	NED	2018-04-01 01:29:00	6.1068	-6.02027	455.503
3	NED	2018-04-01 02:57:00	9.85077	-6.93206	398.055
3	NED	2018-04-01 05:02:00	6.52543	-6.71266	524.305
3	NED	2018-04-01 05:45:00	6.62009	-9.65486	954.269
3	Ex	2018-04-01 07:40:00	18.6512	-18.4033	1393.36
3	NED	2018-04-01 09:01:00	5.41013	-8.66428	905.256
3	Ex	2018-04-01 12:49:00	37.2402	-22.1522	1091.52
3	Er	2018-04-01 12:49:00	-	-	-
3	NED	2018-04-01 16:07:00	12.5863	-12.5252	954.42
3	Er	2018-04-01 16:11:00	25.4	-18.7	1116.95
3	Ex	2018-04-01 17:37:00	14.6462	-15.66	1258.26
3	NED	2018-04-02 00:12:00	7.81927	-11.0248	1067.22
3	Er	2018-04-02 00:17:00	26.0649	-19.5651	1188.28
3	NED	2018-04-02 01:05:00	10.669	-8.69543	565.987
3	NED	2018-04-02 07:36:00	5.37506	-5.74546	461.541
3	NED	2018-04-02 12:08:00	7.33006	-6.67384	474.954
3	Ex	2018-04-02 13:35:00	12.7936	-14.1731	1168.16
3	NED	2018-04-02 19:59:00	3.26457	-5.02751	513.42
3	NED	2018-04-02 20:34:00	10.4905	-6.33637	316.724
3	Ex	2018-04-03 00:03:00	10.7239	-8.20074	506.029
3	NED	2018-04-03 02:00:00	11.1101	-9.55583	649.94
3	Er	2018-04-03 11:14:00	-	-	-
3	Ex	2018-04-03 16:38:00	31.3534	-21.7208	1230.13
3	Ex	2018-04-03 22:30:00	26.9256	-18.9148	1084.47
3	Ex	2018-04-04 20:29:00	10.5582	-10.1481	753.168
3	Ex	2018-04-05 04:44:00	43.6631	-33.0671	2023.61
3	Ex	2018-04-05 18:37:00	23.1704	-18.481	1181.56
3	Ex	2018-04-06 16:14:00	38.5722	-21.3357	980.907
3	Ex	2018-04-08 01:45:00	6.24	-3.1	129.052
3	Ex	2018-04-09 01:56:00	28.5362	-16.0274	747.781
3	Ex	2018-04-09 04:28:00	27.5612	-17.3815	904.305
3	Er	2018-04-09 20:06:00	-	-	-
3	Ex	2018-04-09 20:37:00	9.76603	-5	213.116
3	Ex	2018-04-10 02:30:00	22.1873	-17.0889	1060.91
3	Ex	2018-04-11 17:22:00	8.23618	-7.98146	596.087
3	Ex	2018-04-12 02:11:00	0.88451	-2.97366	435.253
3	Er	2018-04-12 17:24:00	5.15838	-3	144.705
3	Ex	2018-04-12 23:34:00	-	-	-
3	Er	2018-04-13 04:24:00	10.7544	-11.6398	943.508
3	NED	2018-04-13 18:52:00	5.90952	-6.49375	532.133
3	NED	2018-04-13 23:18:00	8.03977	-5.44939	302.676
3	Ex	2018-04-14 02:48:00	28.0822	-19.3402	1089.59
3	Ex	2018-04-14 04:55:00	17.9759	-13.4411	813.626
3	Ex	2018-04-14 09:06:00	24.946	-19.1152	1181.54
3	Ex	2018-04-14 11:11:00	22.0339	-20.0797	1430.04
3	Ex	2018-04-14 16:28:00	20.8132	-13.2959	699.963
3	NED	2018-04-14 17:30:00	9.34524	-5.83746	301.038
3	NED	2018-04-15 04:29:00	16.4429	-9.0591	414.894
3	NED	2018-04-15 06:05:00	4.57696	-6.56158	641.747
3	NED	2018-04-15 08:02:00	13.9028	-9.27078	507.443
3	NED	2018-04-15 12:42:00	6.70834	-6.8914	537.723
3	NED	2018-04-15 16:24:00	9.16765	-6.3155	355.89
3	NED	2018-04-15 17:48:00	1.37016	-6.57995	1071.72
3	NED	2018-04-15 22:33:00	8.68331	-6.08648	348.289
3	NED	2018-04-16 01:16:00	7.57874	-5.69111	345.763
3	NED	2018-04-16 04:21:00	4.97953	-5.22697	414.377
3	Er	2018-04-16 13:23:00	25.7785	-22.2287	1514.99
3	NED	2018-04-16 15:49:00	6.75447	-6.62645	499.527
3	NED	2018-04-16 17:20:00	10.5078	-6.84363	366.688
3	NED	2018-04-16 19:03:00	11.5388	-6.20262	277.358
3	NED	2018-04-16 21:11:00	9.91322	-6.58364	359.045
3	NED	2018-04-17 01:02:00	5.48051	-6.65762	584.999
3	NED	2018-04-17 05:13:00	7.41744	-5.63408	345.662
3	NED	2018-04-17 07:37:00	0.8058	-7.11292	1309.85
3	NED	2018-04-17 09:56:00	5.5496	-8.95871	940.316
3	Ex	2018-04-17 17:01:00	6.9232	-7.00006	539.795
3	Ex	2018-04-17 19:05:00	13.124	-7.38717	345.379
3	Ex	2018-04-18 04:38:00	-	-	-
3	NED	2018-04-18 07:26:00	5.91852	-5.97542	460.276
3	Er	2018-04-18 13:42:00	-	-	-
3	Ex	2018-04-18 14:16:00	11.0249	-9.93048	700.758
3	Er	2018-04-18 16:28:00	12.1041	-4.99797	251.944
3	NED	2018-04-18 19:46:00	1.13823	-5.97175	994.345
3	Ex	2018-04-18 20:56:00	9.66692	-11.069	933.832
3	NED	2018-04-18 22:20:00	5.98673	-6.46378	523.024
3	NED	2018-04-19 02:57:00	8.01778	-5.58201	317.515
3	Ex	2018-04-19 05:58:00	4.95257	-3.2	170.223
3	Ex	2018-04-19 06:47:00	19.2131	-18.3834	1359.65
3	Ex	2018-04-19 14:58:00	7.80702	-5.38872	304.193
3	Er	2018-04-19 15:24:00	10.1777	-6.94128	387.673
3	NED	2018-04-20 03:51:00	6.57873	-5.0525	312.905
3	Ex	2018-04-20 16:05:00	16.7556	-12.567	762.71
3	Er	2018-04-20 16:28:00	-	-	-
3	NED	2018-04-20 23:29:00	5.14721	-5.59355	454.728
3	NED	2018-04-21 05:01:00	8.44785	-6.65554	421.145
3	Ex	2018-04-22 00:38:00	27.4967	-24.0173	1653.89
3	Ex	2018-04-22 07:04:00	19.0929	-13.3536	762.655
3	Ex	2018-04-22 11:44:00	21.6123	-16.7466	1044.97
3	Ex	2018-04-22 17:42:00	6.0155	-10.1575	1093.62
3	Ex	2018-04-22 22:08:00	16.4787	-15.7093	1158.61
3	NED	2018-04-22 23:28:00	11.7471	-6.10501	264.1
3	Ex	2018-04-23 04:18:00	11.4154	-11.8807	935.979
3	Ex	2018-04-23 05:46:00	12.8946	-12.3253	910.886
3	Ex	2018-04-23 09:46:00	25.2022	-25.9327	2025.95
3	NED	2018-04-23 11:15:00	5.3025	-6.87486	630.834
3	Ex	2018-04-23 13:01:00	-	-	-
3	Ex	2018-04-23 23:11:00	3.54279	-4.36675	387.485
3	NED	2018-04-24 03:24:00	6.88326	-6.63664	493.737
3	NED	2018-04-24 07:14:00	26.449	-17.7723	979.484
3	Ex	2018-04-24 17:46:00	22.8776	-22.0501	1639.99
3	Ex	2018-04-24 19:50:00	20.2332	-18.8461	1365.27
3	NED	2018-04-24 22:25:00	16.6495	-9.49821	449.822
3	Ex	2018-04-25 03:56:00	6.13228	-3.7	184.76
3	Ex	2018-04-25 07:38:00	-	-	-
3	Ex	2018-04-25 08:26:00	17.7687	-18.8477	1505.62
3	Ex	2018-04-25 14:48:00	16.0923	-11.2195	638.987
3	NED	2018-04-25 21:43:00	26.8404	-19.1617	1114.3
3	Ex	2018-04-26 00:48:00	27.4347	-24.3002	1692.14
3	Ex	2018-04-26 04:56:00	4.70675	-7.64183	804.736
3	Ex	2018-04-26 10:21:00	-	-	-
3	Er	2018-04-26 11:16:00	50.2571	-42.6204	2865.92
3	Ex	2018-04-26 21:16:00	-	-	-
3	Ex	2018-04-26 23:27:00	25.6811	-27.9274	2271.5
3	Ex	2018-04-27 01:55:00	34.842	-25.188	1480.87
3	Ex	2018-04-27 07:18:00	25.9074	-21.5246	1423.37
3	NED	2018-04-27 19:03:00	15.1945	-6.48344	316.271
3	NED	2018-04-28 02:18:00	7.33714	-6.10164	403.796
3	NED	2018-04-28 04:48:00	-0.15374	-12.5623
3	Ex	2018-04-28 07:08:00	43.5671	-33.9327	2126.57
3	Ex	2018-04-28 20:15:00	16.1997	-7.64472	337.195
3	NED	2018-04-28 23:04:00	5.50253	-8.34077	843.804
3	Ex	2018-04-28 23:51:00	19.2593	-10.8718	509.704
3	NED	2018-04-29 03:06:00	8.76163	-7.66134	528.044
3	Er	2018-04-29 05:15:00	8.68814	-5.95358	333.92
3	Ex	2018-04-29 11:14:00	13.1686	-10.5645	678.699
3	Er	2018-04-29 13:12:00	-	-	-
3	NED	2018-04-29 19:50:00	6.81359	-7.72243	646.848
3	Ex	2018-04-29 20:56:00	-	-	-
3	Ex	2018-04-29 21:13:00	35.169	-29.0037	1906.31
3	Ex	2018-04-30 06:28:00	13.3319	-11.6507	802.616
3	Ex	2018-04-30 20:35:00	16.6325	-10.3992	536.757
3	Ex	2018-05-01 01:53:00	13.4629	-13.4373	1026.2
3	NED	2018-05-01 11:57:00	6.08467	-7.74295	701.828
3	NED	2018-05-01 21:53:00	6.28845	-5.99866	442.636
3	NED	2018-05-01 23:23:00	7.18359	-5.50696	340.522
3	NED	2018-05-02 01:10:00	3.38322	-8.58675	1128.54
3	Ex	2018-05-02 06:45:00	22.5056	-22.552	1727.41
3	Ex	2018-05-02 08:42:00	28.4829	-20.5906	1210.57
3	NED	2018-05-02 09:29:00	7.91011	-9.01508	758.07
3	NED	2018-05-02 11:47:00	6.0608	-6.3221	498.891
3	Ex	2018-05-02 16:48:00	22.162	-14.7718	808.226
3	NED	2018-05-02 18:26:00	6.31805	-5.40783	366.374
3	Ex	2018-05-02 23:00:00	29.7885	-23.5361	1492.9
3	NED	2018-05-03 02:14:00	6.55373	-6.02548	432.1
3	NED	2018-05-03 03:31:00	6.6855	-7.29506	594.8
3	Ex	2018-05-03 08:40:00	14.5965	-24.005	2546.44
3	Ex	2018-05-03 14:33:00	29.9723	-24.2358	1567.23
3	NED	2018-05-03 18:49:00	3.22531	-10.2041	1461.96
3	NED	2018-05-04 01:42:00	15.0678	-6.34404	313.634
3	Ex	2018-05-04 02:56:00	14.4869	-11.7879	766.24
3	Ex	2018-05-04 19:12:00	19.9681	-9.39019	415.634
3	Ex	2018-05-04 22:09:00	48.007	-43.2669	3054.6
3	NED	2018-05-05 12:00:00	6.26054	-6.18567	468.81
3	Er	2018-05-05 14:39:00	9.66186	-8.9523	645.888
3	Er	2018-05-05 16:35:00	-	-	-
3	Er	2018-05-05 16:59:00	3.77167	-6.29529	673.407
3	Er	2018-05-05 18:29:00	-	-	-
3	NED	2018-05-05 18:50:00	7.66681	-5.41647	312.105
3	NED	2018-05-06 01:36:00	4.31603	-7.62717	842.002
3	NED	2018-05-06 03:53:00	4.22006	-5.83751	558.361
3	NED	2018-05-06 10:42:00	4.63274	-5.43729	466.655
3	NED	2018-05-06 17:07:00	7.72631	-6.18223	396.302
3	NED	2018-05-07 06:42:00	6.32755	-5.17859	338.236
3	NED	2018-05-07 08:58:00	7.35186	-5.55437	339.214
3	NED	2018-05-07 11:22:00	4.56591	-6.60396	649.418
3	Ex	2018-05-07 13:02:00	7.91995	-10.0697	912.209
3	NED	2018-05-07 13:46:00	11.4547	-6.94767	348.638
3	NED	2018-05-07 23:29:00	6.23985	-7.12499	599.93
3	NED	2018-05-08 01:06:00	8.21384	-12.156	1212.22
3	NED	2018-05-08 03:23:00	7.4976	-7.03558	512.619
3	NED	2018-05-08 08:07:00	3.83535	-6.29292	666.673
3	NED	2018-05-08 10:33:00	7.37262	-8.62223	738.183
3	NED	2018-05-08 15:18:00	3.57187	-7.33903	875.772
3	NED	2018-05-08 20:01:00	6.98283	-6.7594	504.394
3	NED	2018-05-08 21:46:00	9.30736	-5.48219	267.632
3	NED	2018-05-08 22:54:00	3.26647	-5.72633	629.411
3	NED	2018-05-09 07:35:00	6.76155	-5.39583	345.121
3	NED	2018-05-09 17:58:00	6.3893	-8.62366	812.11
3	NED	2018-05-10 00:58:00	5.13617	-12.9293	1693.36
3	Er	2018-05-10 07:59:00	6.7625	-5.32577	336.896
3	Er	2018-05-10 08:30:00	-	-	-
3	Er	2018-05-10 09:55:00	-	-	-
3	Er	2018-05-10 10:39:00	12.0918	-12.1415	931.428
3	Er	2018-05-10 11:48:00	12.5873	-14.0901	1169.92
3	NED	2018-05-10 12:28:00	5.24954	-5.75763	471.174
3	NED	2018-05-10 13:41:00	6.75187	-5.52327	360.609
3	Ex	2018-05-10 19:32:00	37.9537	-29.274	1819.57
3	Er	2018-05-10 19:57:00	-5.47873	-3.6033	0
3	NED	2018-05-11 06:24:00	1.40694	-6.56931	1062.15
3	NED	2018-05-11 06:55:00	2.73906	-9.71527	1447.91
3	Ex	2018-05-11 08:55:00	25.8773	-16.9647	914.427
3	Ex	2018-05-11 12:02:00	9.57069	-7.96195	527.064
3	Er	2018-05-11 12:49:00	8.76961	-8.25741	603.236
3	Er	2018-05-11 13:51:00	1.41679	-8.22089	1400.95
3	Er	2018-05-11 14:40:00	11.599	-9.39948	608.926
3	NED	2018-05-11 16:57:00	6.1951	-6.21806	476.869
3	NED	2018-05-11 22:14:00	9.57494	-6.60948	373.128
3	NED	2018-05-12 01:10:00	11.1257	-8.25392	496.269
3	NED	2018-05-12 02:12:00	6.3654	-6.50782	505.992
3	Ex	2018-05-12 11:51:00	22.0116	-7.91094	329.331
3	Ex	2018-05-12 21:38:00	8.53198	-6.53531	403.83
3	NED	2018-05-13 00:17:00	5.14615	-7.86849	800.14
3	NED	2018-05-13 02:02:00	2.71178	-5.97285	736.907
3	Ex	2018-05-13 11:58:00	-	-	-
3	Ex	2018-05-13 12:57:00	-	-	-
3	NED	2018-05-13 22:22:00	5.65167	-6.66968	574.593
3	Ex	2018-05-14 00:42:00	16.91	-10.9763	586.322
3	Ex	2018-05-14 03:29:00	19.9349	-15.6285	984.86
3	NED	2018-05-14 06:21:00	6.97343	-6.08733	418.986
3	Ex	2018-05-14 06:57:00	20.9336	-16.8888	1090.08
3	NED	2018-05-14 08:16:00	6.75393	-5.95914	413.684
3	Ex	2018-05-14 09:22:00	17.2199	-12.5285	740.697
3	Ex	2018-05-14 17:41:00	18.1725	-13.2053	779.868
3	NED	2018-05-14 19:22:00	5.56508	-5.80876	458.599
3	Ex	2018-05-14 20:48:00	27.7712	-21.4766	1337.89
3	NED	2018-05-14 21:53:00	8.64371	-5.05782	245.381
3	Er	2018-05-14 23:18:00	-	-	-
3	Er	2018-05-15 03:30:00	5.53795	-4.69995	316.229
3	Er	2018-05-15 04:57:00	-	-	-
3	Er	2018-05-15 06:18:00	3.43736	-2.7885	180.806
3	Ex	2018-05-15 08:08:00	21.4447	-18.0049	1200.88
3	Er	2018-05-15 12:58:00	7.544	-5.72129	350.546
3	Ex	2018-05-15 15:13:00	24.1434	-19.1453	1218.09
3	Er	2018-05-15 16:38:00	-	-	-
3	Er	2018-05-15 17:17:00	3.94051	-4.20707	337.67
3	Er	2018-05-15 18:20:00	4.53314	-5.67105	508.249
3	NED	2018-05-16 03:06:00	8.38734	-5.28895	275.142
3	Er	2018-05-16 09:39:00	-	-	-
3	Er	2018-05-16 10:09:00	-	-	-
3	Er	2018-05-16 17:23:00	7.6871	-6.47278	432.736
3	Er	2018-05-16 19:04:00	12.4068	-9.87755	630.535
3	Ex	2018-05-16 22:20:00	39.1406	-29.2503	1769.76
3	NED	2018-05-17 01:35:00	11.1365	-6.66535	330.329
3	NED	2018-05-17 07:51:00	8.06297	-6.03811	365.982
3	Ex	2018-05-17 10:14:00	29.2588	-15.8134	710.862
3	Ex	2018-05-17 15:19:00	4.85454	-7.18643	716.764
3	NED	2018-05-17 19:00:00	6.15675	-5.30296	361.095
3	NED	2018-05-17 21:26:00	6.1388	-6.45573	512.479
3	Ex	2018-05-18 03:08:00	21.8417	-18.3488	1224.39
3	NED	2018-05-18 04:43:00	6.40428	-5.86912	419.827
3	Ex	2018-05-18 06:06:00	-	-	-
3	NED	2018-05-18 10:23:00	9.06197	-10.2496	857.292
3	NED	2018-05-18 12:24:00	6.65078	-6.87161	538.458
3	Ex	2018-05-18 16:28:00	15.1041	-13.2162	911.394
3	NED	2018-05-18 18:36:00	6.83091	-7.38866	598.646
3	NED	2018-05-18 19:43:00	4.12015	-5.49136	512.977
3	NED	2018-05-18 21:45:00	7.87882	-6.1043	380.863
3	NED	2018-05-18 23:05:00	16.5965	-12.0314	709.074
3	NED	2018-05-19 00:47:00	7.42287	-6.73465	477.961
3	NED	2018-05-19 01:22:00	15.9061	-8.76604	401.591
3	NED	2018-05-19 04:20:00	5.01051	-5.52635	454.061
3	NED	2018-05-19 08:16:00	5.30485	-7.79938	774.673
3	NED	2018-05-19 10:59:00	12.8357	-6.83009	302.401
3	Ex	2018-05-19 13:12:00	17.5298	-15.0398	1020.88
3	NED	2018-05-19 16:00:00	11.994	-8.89164	534.281
3	NED	2018-05-19 17:55:00	8.70422	-6.56963	400.881
3	NED	2018-05-19 19:39:00	14.1163	-11.2459	718.273
3	Ex	2018-05-20 00:45:00	14.9561	-11.9087	760.281
3	Ex	2018-05-20 02:08:00	11.1771	-9.4636	635.536
3	Ex	2018-05-20 04:09:00	30.3504	-17.8235	867.66
3	NED	2018-05-20 05:47:00	10.4278	-6.73908	358.549
3	NED	2018-05-20 09:06:00	9.76504	-7.66503	483.528
3	Ex	2018-05-20 18:56:00	19.9481	-15.3016	946.662
3	Ex	2018-05-20 21:11:00	23.5334	-18.5044	1169
3	NED	2018-05-20 21:59:00	10.086	-6.45642	340.539
3	NED	2018-05-21 01:13:00	5.258	-8.55384	901.802
3	NED	2018-05-21 03:48:00	9.85093	-7.0683	412.859
3	Ex	2018-05-21 09:10:00	20.1793	-17.6963	1222.51
3	NED	2018-05-21 13:10:00	4.43931	-5.583	502.115
3	Ex	2018-05-21 14:33:00	8.11472	-3.55646	168.907
3	Ex	2018-05-21 17:03:00	-	-	-
3	Ex	2018-05-21 17:41:00	13.2239	-9.78534	587.045
3	NED	2018-05-21 18:52:00	3.63009	-6.65485	749.253
3	Ex	2018-05-21 20:03:00	21.0457	-14.2934	795.318
3	NED	2018-05-22 03:35:00	6.26218	-7.472	648.595
3	Ex	2018-05-22 04:45:00	19.8113	-18.355	1324.19
3	NED	2018-05-22 06:43:00	8.89839	-6.31916	365.777
3	NED	2018-05-22 13:07:00	7.79496	-5.74659	343.644
3	NED	2018-05-22 17:20:00	5.69131	-5.74723	442.768
3	Ex	2018-05-22 19:48:00	27.7724	-17.4398	903.768
3	NED	2018-05-22 23:32:00	8.92524	-6.51062	385.785
3	NED	2018-05-23 00:44:00	5.82624	-7.51924	687.89
3	NED	2018-05-23 01:21:00	23.6495	-16.2543	914.084
3	Er	2018-05-23 05:42:00	5.93113	-3.90991	211.807
3	NED	2018-05-23 06:52:00	5.54716	-5.58876	429.818
3	Ex	2018-05-23 08:10:00	10.3705	-5.95032	283.349
3	NED	2018-05-23 13:46:00	7.87681	-5.00402	262.1
3	NED	2018-05-23 15:24:00	5.03621	-5.79766	490.955
3	Ex	2018-05-23 23:58:00	24.464	-21.6655	1508.49
3	NED	2018-05-24 03:04:00	7.79222	-5.61301	328.976
3	NED	2018-05-24 07:37:00	6.67682	-5.48075	358.852
3	Er	2018-05-24 12:26:00	14.24	-8.39352	410.032
3	Ex	2018-05-24 15:12:00	-	-	-
3	Ex	2018-05-24 15:34:00	13.1469	-13.0665	994.718
3	Ex	2018-05-24 19:37:00	29.4457	-24.3388	1602.69
3	Er	2018-05-25 03:03:00	4.30369	-6.19158	606.874
3	Er	2018-05-25 05:02:00	6.42689	-4.07235	212.795
3	Er	2018-05-25 06:55:00	7.5399	-5.60632	337.737
3	Er	2018-05-25 09:00:00	11.6603	-4.714	242.709
3	Er	2018-05-25 09:35:00	17.2016	-10.5834	538.182
3	Ex	2018-05-25 10:42:00	20.4256	-11.6785	554.261
3	Ex	2018-05-25 13:26:00	11.6034	-14.9784	1370.47
3	Er	2018-05-25 14:07:00	-	-	-
3	Er	2018-05-25 15:20:00	3.71424	-4.03874	328.471
3	Er	2018-05-25 16:41:00	5.75087	-7.6469	713.264
3	Ex	2018-05-25 18:19:00	8.83175	-4.4642	187.874
3	Ex	2018-05-25 19:00:00	28.1125	-21.5945	1337.57
3	Er	2018-05-25 22:01:00	37.2678	-36.3717	2731.04
3	NED	2018-05-26 01:59:00	8.84161	-6.47869	385.392
3	NED	2018-05-26 08:55:00	17.8322	-9.57374	427.586
3	NED	2018-05-26 10:20:00	13.5868	-11.2372	740.328
3	Ex	2018-05-26 13:29:00	15.756	-10.5755	582.264
3	NED	2018-05-26 19:08:00	11.1406	-10.0133	705.41
3	Ex	2018-05-27 05:58:00	25.6965	-15.689	792.134
3	NED	2018-05-28 00:33:00	6.1402	-6.36011	499.305
3	Er	2018-05-28 01:24:00	1.04656	-4.01401	613.384
3	Ex	2018-05-28 02:55:00	16.4246	-9.87698	491.669
3	Er	2018-05-28 03:42:00	7.28772	-4.63785	243.309
3	Er	2018-05-28 04:00:00	6.70111	-8.09793	709.039
3	NED	2018-05-28 12:17:00	54.3151	-47.7797	3308.94
3	Er	2018-05-29 00:38:00	6.46589	-6.05207	440.094
3	Er	2018-05-29 01:27:00	1.00708	-4.5456	728.299
3	Ex	2018-05-29 03:34:00	58.494	-53.3809	3805.85
3	Er	2018-05-29 05:04:00	2.33136	-4.64925	546.642
3	Er	2018-05-29 05:46:00	3.81189	-8.33167	1024.23
3	Er	2018-05-29 06:32:00	2.09157	-2.30031	188.615
3	Ex	2018-05-30 08:01:00	83.0323	-85.8705	6733.48
3	NED	2018-05-30 22:47:00	12.4741	-7.9419	416.812
3	Ex	2018-05-31 11:45:00	32.0223	-22.9968	1344.26
3	Er	2018-05-31 18:35:00	11.3562	-8.51894	517.112
3	NED	2018-05-31 21:34:00	7.47951	-6.1789	406.69
3	Er	2018-06-02 01:09:00	7.62425	-6.86085	483.78
3	Er	2018-06-02 11:30:00	43.6616	-37.4274	2538.73
3	Er	2018-06-02 18:36:00	17.5117	-12.4761	724.211
3	NED	2018-06-05 18:43:00	9.70629	-10.2513	816.342
3	NED	2018-06-05 23:42:00	9.9175	-7.14455	418.77
3	Ex	2018-06-06 11:10:00	14.3248	-16.4765	1394.43
3	Er	2018-06-06 15:35:00	8.36852	-5.6179	309.358
3	NED	2018-06-07 06:39:00	21.2684	-119.227
3	Ex	2018-06-07 12:26:00	8.71686	-4.70285	211.044
3	Ex	2018-06-07 18:10:00	12.1925	-8.49264	483.287
3	NED	2018-06-08 08:24:00	14.9037	-14.2869	1058.2
3	NED	2018-06-08 13:10:00	6.4368	-5.54502	377.624
3	Ex	2018-06-08 18:54:00	10.4035	-6.9246	378.394
3	Ex	2018-06-09 05:43:00	6.52051	-8.592	796.739
3	Er	2018-06-09 09:53:00	3.1555	-2.78932	193.92
3	NED	2018-06-09 10:40:00	5.74741	-5.05315	349.801
3	Er	2018-06-09 10:54:00	4.99961	-4.63344	334.348
3	Ex	2018-06-09 14:42:00	7.31237	-10.4411	1018.66
3	Er	2018-06-09 15:09:00	11.8359	-11.9253	917.189
3	Ex	2018-06-09 21:27:00	74.7344	-65.7237	4550.62
3	Er	2018-06-10 11:35:00	45.9216	-35.2543	2182.6
3	Er	2018-06-10 11:58:00	3.15146	-5.03498	525.336
3	Ex	2018-06-10 14:22:00	9.82743	-15.409	1590.31
3	NED	2018-06-10 21:38:00	9.73142	-7.79945	500.657
3	NED	2018-06-11 01:17:00	11.3641	-6.15723	277.458
3	NED	2018-06-11 04:30:00	4.73291	-5.62064	486.313
3	Er	2018-06-11 08:23:00	11.0867	-4.99713	230.769
3	NED	2018-06-11 11:16:00	10.4437	-5.81747	269.274
3	NED	2018-06-12 10:52:00	12.3983	-9.15133	547.818
3	NED	2018-06-12 14:16:00	4.39482	-6.03143	574.042
3	NED	2018-06-12 16:03:00	6.59156	-8.6275	796.556
3	Er	2018-06-12 19:40:00	6.01185	-1.96587	125.136
3	NED	2018-06-12 20:40:00	6.01386	-5.38801	378.61
3	NED	2018-06-12 22:59:00	7.22928	-6.08942	407.223
3	NED	2018-06-13 00:07:00	8.01456	-7.15438	501.283
3	Er	2018-06-13 03:16:00	9.80366	-7.43804	455.892
3	NED	2018-06-13 03:31:00	8.50999	-7.4094	508.925
3	NED	2018-06-13 05:20:00	6.50043	-6.94699	557.98
3	Er	2018-06-13 09:56:00	11.6395	-9.04242	565.472
3	NED	2018-06-13 13:21:00	5.65887	-5.46738	407.39
3	Er	2018-06-13 14:14:00	4.9033	-3.57036	211.232
3	NED	2018-06-13 16:04:00	9.28454	-7.53856	489.156
3	NED	2018-06-13 16:47:00	8.49983	-7.50683	521.526
3	NED	2018-06-13 22:20:00	5.88466	-6.7855	575.264
3	NED	2018-06-14 05:04:00	7.07738	-6.9629	526.014
3	Er	2018-06-14 08:45:00	10.0619	-8.88741	617.494
3	NED	2018-06-14 09:32:00	12.9506	-5.75733	269.565
3	NED	2018-06-14 10:18:00	9.29913	-9.99677	806.375
3	NED	2018-06-14 10:58:00	12.2885	-9.35228	574.738
3	Er	2018-06-14 11:38:00	12.629	-9.85155	618.212
3	Er	2018-06-14 12:33:00	5.73843	-6.31842	518.509
3	NED	2018-06-14 22:20:00	0.42412	-7.76067	1549.97
3	NED	2018-06-15 00:06:00	11.1638	-9.57381	649.622
3	NED	2018-06-15 00:47:00	6.41426	-8.55501	799.532
3	NED	2018-06-15 05:39:00	5.033	-7.47307	746.71
3	NED	2018-06-15 07:46:00	6.57689	-5.95389	421.813
3	NED	2018-06-15 09:52:00	8.35649	-5.72437	320.967
3	NED	2018-06-15 11:09:00	5.53276	-7.48883	706.52
3	NED	2018-06-15 12:28:00	9.86111	-7.97349	515.598
3	Ex	2018-06-16 07:19:00	125.073	-123.532	9359.83
3	Er	2018-06-16 12:33:00	4.48554	-4.58388	356.286
3	Ex	2018-06-16 17:57:00	4.32559	-5.62334	516.9
3	Ex	2018-06-16 19:17:00	3.15301	-5.97445	684.393
3	Ex	2018-06-16 23:02:00	12.8383	-10.496	684.943
3	Ex	2018-06-16 23:55:00	9.92777	-8.02478	518.775
3	NED	2018-06-17 00:54:00	12.6563	-8.61373	480.19
3	NED	2018-06-17 07:02:00	9.33428	-5.99405	317.062
3	NED	2018-06-17 09:03:00	6.22687	-6.09906	459.212
3	NED	2018-06-17 16:53:00	7.00498	-7.01208	536.682
3	Ex	2018-06-17 17:36:00	7.58699	-9.49267	850.82
3	Ex	2018-06-18 05:40:00	6.56625	-7.62505	649.619
3	NED	2018-06-18 12:54:00	2.98974	-6.57251	810.165
3	NED	2018-06-18 13:50:00	1.55375	-6.75434	1071
3	NED	2018-06-18 16:40:00	5.59192	-6.86919	608.155
3	NED	2018-06-18 18:32:00	6.53293	-6.90501	550.17
3	NED	2018-06-18 19:15:00	5.45601	-6.21169	521.954
3	NED	2018-06-18 21:26:00	8.82554	-7.23671	473.401
3	NED	2018-06-19 05:57:00	4.22622	-5.41276	492.704
3	Ex	2018-06-19 06:27:00	33.7029	-22.9706	1282.18
3	NED	2018-06-19 07:30:00	6.84897	-7.99856	684.122
3	NED	2018-06-19 14:23:00	5.98523	-6.92544	588.546
3	NED	2018-06-19 14:55:00	7.77559	-5.69113	338.212
3	NED	2018-06-19 17:02:00	6.6236	-6.23464	455.346
3	NED	2018-06-19 18:08:00	13.9377	-9.83523	566.139
3	NED	2018-06-19 19:07:00	6.77705	-5.31117	334.593
3	NED	2018-06-19 20:30:00	10.9665	-8.4539	525.221
3	NED	2018-06-19 21:22:00	6.02693	-7.64619	691.667
3	NED	2018-06-20 00:11:00	8.6465	-5.98532	338.732
3	NED	2018-06-20 01:25:00	8.90273	-7.41405	491.216
3	NED	2018-06-20 02:44:00	8.31798	-7.05108	473.973
3	NED	2018-06-20 03:19:00	9.10466	-6.29504	355.888
3	NED	2018-06-20 04:11:00	7.73407	-5.19905	286.642
3	NED	2018-06-20 05:04:00	21.9048	-16.2834	980.738
3	NED	2018-06-20 08:20:00	34.5251	-26.9089	1687.38
3	NED	2018-06-20 09:36:00	5.98164	-6.79603	570.225
3	NED	2018-06-20 14:03:00	16.6065	-11.4457	645.271
3	NED	2018-06-20 15:02:00	5.53334	-5.39433	404.704
3	NED	2018-06-20 16:18:00	14.3154	-7.8374	356.757
3	NED	2018-06-20 16:37:00	7.47701	-5.41767	319.155
3	NED	2018-06-20 17:16:00	16.6205	-9.20611	423.814
3	NED	2018-06-20 19:21:00	9.87637	-8.41895	568.487
3	NED	2018-06-20 20:29:00	8.58696	-6.08784	351.872
3	NED	2018-06-20 22:29:00	25.4304	-18.1813	1058.63
3	NED	2018-06-21 00:10:00	8.80038	-6.84718	428.741
3	NED	2018-06-21 01:24:00	9.20934	-7.94095	541.202
3	Ex	2018-06-21 04:04:00	36.2256	-22.3601	1140.46
3	NED	2018-06-21 05:09:00	6.31369	-7.59454	662.875
3	NED	2018-06-21 08:19:00	4.91208	-9.0958	1029.51
3	Ex	2018-06-21 13:13:00	29.2548	-20.7576	1200.64
3	NED	2018-06-21 13:48:00	1.53801	-6.1858	959.02
3	NED	2018-06-21 17:40:00	8.26846	-6.21797	378.238
3	NED	2018-06-21 18:52:00	8.30975	-7.52211	532.889
3	NED	2018-06-21 19:44:00	6.93525	-6.52483	476.362
3	NED	2018-06-21 20:55:00	6.34434	-6.19618	465.503
3	NED	2018-06-21 22:07:00	6.37322	-5.00549	315.909
3	NED	2018-06-21 22:40:00	7.58661	-7.95404	630.015
3	NED	2018-06-21 23:14:00	10.2199	-8.69445	586.143
3	NED	2018-06-22 02:17:00	10.108	-7.64634	467.48
3	NED	2018-06-22 04:04:00	5.1744	-6.84421	636.228
3	NED	2018-06-22 06:09:00	9.60851	-8.23584	558.604
3	NED	2018-06-22 10:36:00	5.52503	-5.31583	394.837
3	NED	2018-06-22 12:26:00	9.5043	-7.74539	504.106
3	Er	2018-06-22 14:38:00	0.89735	-2.28038	299.867
3	Er	2018-06-22 15:10:00	-	-	-
3	NED	2018-06-22 17:07:00	8.2174	-9.06996	745.6
3	NED	2018-06-22 17:39:00	4.22465	-5.71979	539.716
3	NED	2018-06-22 19:05:00	6.66225	-5.17144	323.172
3	NED	2018-06-22 21:17:00	8.65446	-7.84397	556.239
3	NED	2018-06-23 00:32:00	7.3173	-8.42633	713.714
3	NED	2018-06-23 05:38:00	5.3058	-5.57514	442.309
3	NED	2018-06-27 19:39:00	6.08538	-6.21977	483.494
3	NED	2018-06-27 23:35:00	4.60651	-6.62414	649.086
3	NED	2018-06-29 04:21:00	5.52489	-7.18639	660.813
3	NED	2018-07-01 14:05:00	11.2548	-11.1992	853.321
3	NED	2018-07-01 22:15:00	5.83463	-5.95626	462.594
3	Er	2018-07-01 23:19:00	-	-	-
3	NED	2018-07-02 02:16:00	5.68854	-6.05429	484.824
3	Ex	2018-07-02 15:13:00	20.0637	-13.6865	764.54
3	Ex	2018-07-02 17:48:00	17.693	-13.7851	864.16
3	Ex	2018-07-02 20:31:00	47.1071	-36.6369	2293.26
3	NED	2018-07-02 21:12:00	8.65358	-8.65152	661.539
3	Ex	2018-07-03 18:20:00	17.6265	-14.3071	928.092
3	NED	2018-07-04 02:15:00	8.51916	-7.14626	476.288
3	NED	2018-07-04 03:22:00	9.63343	-5.66246	275.89
3	NED	2018-07-04 05:00:00	7.92004	-6.39683	413.262
3	Ex	2018-07-04 17:02:00	26.6105	-21.6709	1409.64
3	NED	2018-07-04 20:26:00	6.98234	-9.71529	932.702
3	NED	2018-07-04 23:33:00	15.1458	-12.1578	781.432
3	NED	2018-07-05 01:41:00	13.0348	-8.52877	458.903
3	NED	2018-07-05 03:50:00	3.6617	-6.9308	793.499
3	NED	2018-07-05 12:09:00	15.9306	-7.56671	315
3	NED	2018-07-05 16:44:00	54.3057	-38.1325	2185.47
3	NED	2018-07-05 17:35:00	28.5616	-19.9779	1141.09
3	NED	2018-07-05 18:52:00	8.3889	-5.42966	289.283
3	NED	2018-07-05 19:41:00	7.47992	-6.0735	394.103
3	NED	2018-07-06 03:58:00	11.0581	-9.18062	606.724
3	NED	2018-07-06 14:43:00	4.73927	-6.03147	546.733
3	NED	2018-07-06 19:46:00	4.5487	-5.98306	554.169
3	NED	2018-07-07 04:30:00	14.9874	-8.82491	430.684
3	NED	2018-07-07 10:08:00	8.06767	-5.69013	327.392
3	NED	2018-07-07 15:22:00	10.7429	-8.72311	566.04
3	NED	2018-07-07 21:32:00	33.8946	-57.3535	6182.29
3	NED	2018-07-07 22:08:00	5.38904	-9.01874	966.172
3	NED	2018-07-08 09:16:00	4.52381	-8.39387	951.074
3	NED	2018-07-08 10:02:00	8.72896	-7.79178	545.925
3	NED	2018-07-08 11:30:00	21.8858	-21.4945	1621.68
3	NED	2018-07-08 12:23:00	10.3709	-7.48427	439.351
3	NED	2018-07-08 13:14:00	7.78747	-5.54233	321.426
3	NED	2018-07-08 15:16:00	6.99476	-6.88093	519.782
3	NED	2018-07-08 16:11:00	10.0239	-6.60345	357.5
3	NED	2018-07-08 16:48:00	6.22851	-7.31883	628.65
3	NED	2018-07-08 18:42:00	4.84726	-9.1695	1049.49
3	NED	2018-07-09 10:52:00	7.23296	-6.52767	461.343
3	Er	2018-07-09 11:49:00	27.1614	-22.7202	1510.79
3	NED	2018-07-10 04:42:00	6.66413	-5.62905	377.291
3	NED	2018-07-10 22:44:00	10.0645	-6.3813	333.637
3	NED	2018-07-11 10:05:00	7.04709	-5.50109	345.411
3	NED	2018-07-11 11:17:00	7.34182	-6.43147	443.92
3	Er	2018-07-11 19:51:00	-	-	-
3	Er	2018-07-12 06:30:00	6.8971	-2.1649	90.1243
3	Er	2018-07-12 07:02:00	1.36769	-4.15339	586.214
3	NED	2018-07-12 07:43:00	9.07416	-5.82202	307.721
3	Er	2018-07-12 08:07:00	1.50283	-5.0083	730.848
3	Er	2018-07-12 11:39:00	5.72792	-3.63432	190.14
3	NED	2018-07-12 15:47:00	3.75903	-6.14095	648.967
3	Er	2018-07-12 18:45:00	4.3096	-3.24475	197.58
3	NED	2018-07-14 04:24:00	7.04482	-5.39684	333.516
3	NED	2018-07-15 01:43:00	38.9521	-35.0249	2468.21
3	NED	2018-07-15 03:04:00	16.1183	-7.76073	335.501
3	Ex	2018-07-16 15:38:00	77.0345	-72.33	5272.43
3	NED	2018-07-17 03:55:00	6.08383	-5.39809	376.412
3	Er	2018-07-17 13:36:00	1.46818	-1.74644	151.278
3	NED	2018-07-20 16:20:00	13.0824	-6.85512	298.962
3	Ex	2018-07-20 22:29:00	-	-	-
3	NED	2018-07-20 23:23:00	9.00789	-7.63913	513.677
3	NED	2018-07-21 06:20:00	1.15997	-5.92008	979.152
3	NED	2018-07-21 16:25:00	3.53966	-6.37232	710.54
3	NED	2018-07-21 22:54:00	4.85333	-7.19082	717.575
3	NED	2018-07-22 02:21:00	7.88782	-7.19713	513.06
3	Ex	2018-07-22 06:04:00	-	-	-
3	Ex	2018-07-22 07:31:00	-	-	-
3	NED	2018-07-22 22:47:00	8.99733	-7.28943	472.136
3	Ex	2018-07-22 22:57:00	9.38108	-4.64639	193.428
3	NED	2018-07-23 02:37:00	4.17193	-6.38909	650.316
3	NED	2018-07-23 08:48:00	7.01823	-7.14311	553.538
3	NED	2018-07-23 18:26:00	4.4328	-6.83283	698.158
3	Ex	2018-07-23 23:22:00	-	-	-
3	NED	2018-07-24 07:22:00	12.4044	-7.5349	378.63
3	Er	2018-07-24 07:30:00	9.24366	-6.52394	375.588
3	NED	2018-07-24 09:19:00	6.81552	-5.38869	342.002
3	NED	2018-07-24 11:00:00	7.47372	-5.07353	282.188
3	NED	2018-07-24 20:26:00	8.47948	-8.88986	704.122
3	Ex	2018-07-24 21:35:00	18.9548	-10.7534	506.565
3	NED	2018-07-24 22:09:00	8.86442	-8.50379	630.208
3	NED	2018-07-25 04:11:00	7.74834	-7.03827	499.974
3	NED	2018-07-25 07:02:00	13.4378	-6.02987	279.706
3	NED	2018-07-25 08:22:00	6.79747	-5.54343	361.004
3	NED	2018-07-25 14:43:00	5.07216	-7.34247	722.421
3	NED	2018-07-25 16:47:00	15.3238	-10.5465	593.814
3	Ex	2018-07-25 18:06:00	5.42626	-6.56802	575.719
3	NED	2018-07-25 21:05:00	10.3112	-6.27806	316.162
3	NED	2018-07-26 00:08:00	6.83245	-6.80229	518.505
3	NED	2018-07-26 02:57:00	11.6981	-8.17349	466.398
3	Ex	2018-07-26 03:56:00	20.5442	-16.8006	1096.61
3	NED	2018-07-26 21:05:00	6.08424	-5.26933	360.392
3	Ex	2018-07-26 21:41:00	32.0545	-24.728	1537.22
3	Er	2018-07-26 23:14:00	8.40685	-10.3103	911.808
3	NED	2018-07-27 00:50:00	7.23979	-6.47908	454.874
3	NED	2018-07-27 03:19:00	6.77263	-5.886	403.698
3	NED	2018-07-27 08:18:00	7.66933	-5.85226	360.457
3	Ex	2018-07-27 10:40:00	9.30528	-6.33786	353.554
3	NED	2018-07-27 11:22:00	10.9614	-6.20517	291.706
3	NED	2018-07-27 12:49:00	9.46622	-5.78825	292.656
3	NED	2018-07-27 14:43:00	7.80596	-5.35614	300.765
3	Ex	2018-07-27 15:35:00	4.3	-3.8	264.13
3	Ex	2018-07-27 16:28:00	10.1838	-7.67722	467.989
3	Ex	2018-07-27 17:14:00	18.7876	-15.0388	964.35
3	Ex	2018-07-27 18:38:00	36.5329	-27.2499	1646.04
3	NED	2018-07-27 19:31:00	9.58059	-6.06188	316.334
3	NED	2018-07-28 02:35:00	8.54976	-5.97428	340.932
3	NED	2018-07-28 04:01:00	9.64807	-9.785	756.268
3	NED	2018-07-28 09:29:00	5.65172	-5.63704	430.273
3	Er	2018-07-28 15:18:00	12.3772	-10.7454	736.35
3	NED	2018-07-28 18:08:00	1.24636	-7.91456	1374.81
3	NED	2018-07-28 21:02:00	5.74427	-5.53103	411.063
3	Ex	2018-07-29 07:37:00	20.1193	-15.8459	1002.44
3	NED	2018-07-29 08:52:00	7.6002	-6.38887	426.543
3	Er	2018-07-29 08:58:00	6.8508	-6.69875	503.712
3	NED	2018-07-29 10:48:00	8.61118	-6.92853	446.194
3	NED	2018-07-29 11:36:00	6.05765	-5.63107	407.298
3	NED	2018-07-29 14:59:00	7.45794	-7.92733	634.228
3	NED	2018-07-29 15:15:00	13.4214	-8.39529	433.503
3	NED	2018-07-29 21:13:00	10.0676	-7.41352	442.887
3	NED	2018-07-30 04:16:00	6.19011	-7.25835	622.546
3	NED	2018-07-30 06:09:00	7.10451	-5.48588	341.305
3	NED	2018-07-30 06:49:00	2.63763	-7.10007	956.219
3	NED	2018-07-30 07:30:00	5.09696	-5.75001	480.059
3	NED	2018-07-30 10:13:00	6.26966	-8.25289	764.78
3	NED	2018-07-30 11:25:00	9.51801	-7.71897	500.371
3	NED	2018-07-30 12:14:00	11.3887	-8.1859	478.863
3	NED	2018-07-30 12:57:00	5.63767	-7.11269	641.042
3	Ex	2018-07-30 18:16:00	17.318	-12.4497	728.387
3	NED	2018-07-31 01:01:00	5.71426	-5.57073	417.94
3	NED	2018-07-31 03:40:00	4.87723	-5.88932	515.387
3	NED	2018-07-31 11:13:00	5.22916	-8.61973	915.582
3	NED	2018-07-31 21:38:00	5.4256	-5.4001	411.534
3	NED	2018-07-31 22:38:00	5.04969	-5.45615	441.728
3	NED	2018-08-01 01:12:00	14.086	-7.83058	361.752
3	NED	2018-08-01 01:59:00	6.02549	-5.00084	330.405
3	NED	2018-08-01 04:33:00	6.22944	-5.17884	342.639
3	NED	2018-08-01 05:27:00	9.75085	-7.88507	509.92
3	NED	2018-08-01 07:04:00	7.12996	-7.71607	625.404
3	Ex	2018-08-01 17:39:00	23.5237	-16.4953	944.245
3	NED	2018-08-02 00:02:00	5.39011	-5.97072	492.082
3	NED	2018-08-02 01:56:00	4.43156	-6.25248	605.498
3	NED	2018-08-02 02:35:00	8.99614	-7.56114	504.743
3	NED	2018-08-02 13:56:00	5.95448	-5.27344	367.174
3	Ex	2018-08-02 22:25:00	12.5489	-8.63453	486.058
3	NED	2018-08-03 02:25:00	8.85966	-6.6263	401.195
3	NED	2018-08-03 04:56:00	5.27281	-7.35754	707.61
3	Ex	2018-08-03 07:53:00	8.04541	-6.66339	439.499
3	Ex	2018-08-03 10:40:00	8.66922	-6.16757	357.57
3	NED	2018-08-04 01:53:00	4.98648	-6.80515	645.385
3	NED	2018-08-04 02:50:00	6.37272	-5.55531	381.947
3	Er	2018-08-04 09:10:00	7.30589	-5.07916	288.548
3	Er	2018-08-04 09:53:00	0.01535	-2.58279	553.751
3	Er	2018-08-04 11:42:00	2.03198	-1.37534	76.2942
3	NED	2018-08-04 16:08:00	6.98991	-6.91427	524.485
3	Er	2018-08-04 16:14:00	7.41099	-7.40021	565.341
3	Ex	2018-08-05 17:24:00	13.4215	-21.3803	2226.99
3	Er	2018-08-05 18:16:00	-	-	-
3	Er	2018-08-05 18:42:00	0.07184	-3.54672	744.473
3	NED	2018-08-06 03:56:00	5.28496	-8.39651	873.24
3	Er	2018-08-06 05:38:00	9.31497	-7.57271	491.88
3	NED	2018-08-06 09:30:00	7.01774	-7.50502	603.103
3	NED	2018-08-06 13:55:00	7.51407	-6.98345	505.033
3	NED	2018-08-06 18:59:00	8.94385	-8.04068	566.549
3	NED	2018-08-07 05:48:00	9.35075	-9.40807	722.817
3	Er	2018-08-07 09:54:00	6.85403	-7.02673	547.455
3	Er	2018-08-07 13:04:00	1.43842	-4.70044	681.24
3	NED	2018-08-07 15:34:00	9.29053	-6.50912	372.323
3	NED	2018-08-07 16:05:00	4.86531	-5.85447	511.123
3	NED	2018-08-07 17:22:00	5.44293	-6.87317	619.824
3	NED	2018-08-07 18:41:00	6.09259	-6.96632	587.129
3	NED	2018-08-07 21:39:00	7.52126	-7.40424	559.62
3	NED	2018-08-07 22:01:00	10.0656	-8.96727	627.307
3	NED	2018-08-08 02:05:00	6.98822	-6.04462	412.999
3	NED	2018-08-08 02:44:00	8.08328	-7.06519	486.79
3	NED	2018-08-08 03:46:00	8.92155	-5.01326	234.01
3	NED	2018-08-08 04:18:00	3.8687	-6.17739	644.321
3	NED	2018-08-08 05:42:00	9.67383	-5.70025	278.379
3	NED	2018-08-08 07:42:00	7.5946	-6.19465	403.475
3	Er	2018-08-08 08:29:00	7.59807	-8.22168	666.327
3	NED	2018-08-08 10:41:00	5.66538	-6.38139	532.191
3	NED	2018-08-08 11:21:00	8.17125	-6.01594	359.335
3	NED	2018-08-09 00:18:00	5.41377	-8.17102	824.512
3	NED	2018-08-09 05:21:00	8.87335	-6.31309	366.021
3	NED	2018-08-09 07:23:00	7.13128	-6.46899	459.045
3	NED	2018-08-09 09:27:00	8.99707	-6.55318	387.802
3	NED	2018-08-09 18:24:00	8.16534	-6.37134	399.912
3	NED	2018-08-09 19:46:00	9.32261	-6.83897	407.227
3	Ex	2018-08-10 00:03:00	15.3431	-14.2068	1024.45
3	NED	2018-08-10 02:16:00	6.84024	-7.92009	673.39
3	NED	2018-08-10 07:23:00	9.24653	-5.76997	297.28
3	NED	2018-08-10 08:26:00	6.66837	-5.23928	330.769
3	NED	2018-08-10 11:40:00	5.66908	-6.02539	482.034
3	NED	2018-08-10 17:58:00	8.80977	-6.5677	396.544
3	Ex	2018-08-10 20:43:00	22.7008	-17.2337	1056.83
3	NED	2018-08-11 10:14:00	8.7449	-5.50683	286.113
3	Er	2018-08-11 12:56:00	15.7505	-11.6287	696.279
3	NED	2018-08-12 00:20:00	3.93746	-6.37242	669.832
3	NED	2018-08-12 21:38:00	8.09913	-6.44125	410.816
3	NED	2018-08-12 23:08:00	8.13648	-8.32986	648.312
3	NED	2018-08-13 14:24:00	10.8822	-5.73446	251.479
3	Ex	2018-08-13 17:17:00	16.1606	-11.7922	698.932
3	Ex	2018-08-13 19:38:00	10.011	-11.5442	978.741
3	NED	2018-08-13 23:50:00	8.81673	-5.08266	243.119
3	NED	2018-08-14 09:37:00	6.12791	-6.28604	489.963
3	NED	2018-08-14 13:29:00	8.26083	-5.43869	294.282
3	NED	2018-08-14 15:01:00	21.7924	-12.0191	551.024
3	NED	2018-08-14 16:38:00	5.44677	-5.10115	371.112
3	Ex	2018-08-14 18:14:00	9.80466	-7.77942	495.193
3	Ex	2018-08-14 20:47:00	9.81683	-7.38527	449.396
3	Ex	2018-08-14 23:19:00	9.82483	-10.1804	799.435
3	Er	2018-08-15 01:57:00	8.75966	-6.91922	438.789
3	NED	2018-08-15 06:22:00	5.43907	-8.05008	802.803
3	Ex	2018-08-15 13:57:00	15.5758	-11.6888	709.757
3	Ex	2018-08-15 22:34:00	9.20357	-8.39883	598.79
3	NED	2018-08-16 01:41:00	5.17795	-6.6564	607.39
3	NED	2018-08-16 03:14:00	4.34622	-5.75955	536.047
3	NED	2018-08-16 04:59:00	7.63162	-6.98067	498.598
3	NED	2018-08-16 06:21:00	5.65511	-5.30487	386.418
3	Ex	2018-08-16 07:06:00	3.19449	-5.0457	522.978
3	Ex	2018-08-16 13:18:00	11.5228	-7.98643	452.487
3	NED	2018-08-16 18:42:00	5.61667	-5.47981	411.359
3	NED	2018-08-16 20:46:00	12.0182	-13.2413	1087.11
3	NED	2018-08-16 21:59:00	6.90694	-5.86618	394.938
3	Er	2018-08-17 01:45:00	5.02173	-3.25304	173.45
3	NED	2018-08-17 04:21:00	7.00377	-7.35958	583.895
3	Er	2018-08-17 20:15:00	0.93576	-3.31956	494.753
3	NED	2018-08-19 03:46:00	5.53052	-7.47046	703.866
3	NED	2018-08-19 09:42:00	10.8921	-10.6623	802.433
3	NED	2018-08-19 14:01:00	10.2882	-9.23559	649.983
3	Ex	2018-08-19 23:03:00	11.9123	-9.64179	624.001
3	NED	2018-08-20 01:08:00	6.39836	-5.76117	406.431
3	NED	2018-08-20 21:27:00	5.85357	-5.52087	403.84
3	NED	2018-08-21 05:14:00	7.01307	-6.21628	433.116
3	NED	2018-08-21 08:56:00	5.91216	-7.07246	614.99
3	NED	2018-08-21 10:19:00	8.58316	-6.09418	352.698
3	Ex	2018-08-21 12:18:00	10.5025	-9.0586	617.516
3	Ex	2018-08-21 16:32:00	-2.30437	-3.29229	0
3	Ex	2018-08-21 20:23:00	11.7032	-13.3822	1127.9
3	Ex	2018-08-21 22:12:00	1.20154	-3.87281	558.574
3	NED	2018-08-22 00:57:00	7.72577	-7.98967	626.495
3	Ex	2018-08-22 07:50:00	14.0944	-7.88264	366.279
3	NED	2018-08-22 12:36:00	5.81383	-7.79152	730.426
3	NED	2018-08-22 17:29:00	5.00189	-7.59724	769.51
3	NED	2018-08-22 19:44:00	4.67507	-6.33586	598.223
3	Ex	2018-08-23 00:47:00	18.522	-13.3269	780.305
3	NED	2018-08-23 04:14:00	5.70451	-5.86303	457.646
3	Ex	2018-08-23 07:43:00	-	-	-
3	Ex	2018-08-23 08:18:00	-	-	-
3	Ex	2018-08-23 14:29:00	-	-	-
3	Ex	2018-08-23 16:36:00	5.12295	-8.12382	843.959
3	NED	2018-08-24 02:35:00	6.08634	-5.48541	387.266
3	NED	2018-08-24 12:02:00	14.9396	-11.3159	692.593
3	Ex	2018-08-24 17:04:00	9.36442	-3.34471	139.24
3	NED	2018-08-24 22:17:00	5.77594	-5.02064	344.393
3	Ex	2018-08-25 00:01:00	1.70824	-2.91013	314.872
3	Er	2018-08-25 15:51:00	13.1311	-6.81857	294.723
3	NED	2018-08-25 19:01:00	6.21776	-7.79698	699.881
3	Ex	2018-08-25 20:04:00	7.08452	-8.90279	800.272
3	NED	2018-08-25 21:38:00	4.49093	-6.23826	598.265
3	Ex	2018-08-26 08:35:00	25.9991	-21.0323	1360.57
3	Ex	2018-08-26 16:44:00	20.613	-12.9792	674.291
3	Er	2018-08-26 17:09:00	4.48711	-4.8743	396.145
3	NED	2018-08-26 18:16:00	8.9841	-6.9141	428.946
3	NED	2018-08-26 20:27:00	8.60868	-6.70542	420.255
3	NED	2018-08-26 23:26:00	6.75542	-5.96733	414.633
3	NED	2018-08-27 11:57:00	6.58247	-5.75018	396.008
3	Er	2018-08-27 13:04:00	-	-	-
3	Er	2018-08-27 15:12:00	0.44108	-2.94562	516.847
3	Ex	2018-08-27 15:40:00	-	-	-
3	NED	2018-08-27 17:16:00	5.52883	-5.89586	472.81
3	NED	2018-08-27 20:16:00	8.80637	-6.86004	429.98
3	NED	2018-08-27 21:30:00	7.72219	-6.82871	474.895
3	NED	2018-08-28 03:50:00	4.95788	-8.23783	878.959
3	Er	2018-08-28 07:53:00	4.94656	-8.29615	889.84
3	Ex	2018-08-28 18:08:00	22.0274	-17.0095	1058.28
3	Er	2018-08-28 18:44:00	-	-	-
3	NED	2018-08-28 23:09:00	7.54897	-5.85352	365.469
3	Ex	2018-08-29 02:04:00	15.4076	-9.14593	449.763
3	Ex	2018-08-29 03:07:00	9.94177	-7.227	426.945
3	Ex	2018-08-29 05:30:00	13.4845	-11.2327	744.388
3	Er	2018-08-29 10:06:00	23.1763	-16.8228	992.562
3	NED	2018-08-29 11:52:00	4.78528	-7.70208	807.048
3	Ex	2018-08-29 14:09:00	24.811	-16.8897	941.724
3	Ex	2018-08-30 07:13:00	6.01702	-6.22595	488.393
3	Er	2018-08-30 09:17:00	33.6708	-23.7022	1361.44
3	Er	2018-08-30 09:46:00	2.45269	-3.54118	347.852
3	NED	2018-08-30 12:53:00	14.8488	-9.19463	470.357
3	NED	2018-08-30 23:20:00	11.9969	-7.57754	394.796
3	NED	2018-08-31 01:17:00	10.2374	-2.06989	86.169
3	NED	2018-08-31 02:55:00	10.2649	-6.39593	329.079
3	Ex	2018-08-31 05:10:00	12.042	-10.0616	668.436
3	NED	2018-08-31 06:36:00	7.30988	-6.77203	488.529
3	Ex	2018-08-31 07:50:00	15.7322	-12.1701	758.34
3	Er	2018-08-31 09:18:00	3.57682	-4.49603	404.22
3	NED	2018-08-31 09:49:00	8.10297	-9.17466	767.952
3	Er	2018-08-31 11:23:00	8.10919	-5.92215	351.265
3	NED	2018-08-31 12:09:00	5.74202	-6.09503	487.147
3	NED	2018-08-31 13:39:00	4.21297	-5.50467	507.659
3	NED	2018-08-31 15:27:00	4.9197	-5.25856	422.418
3	Ex	2018-08-31 16:03:00	13.6631	-11.4613	763.88
3	Ex	2018-08-31 17:15:00	7.36459	-4.94507	272.363
3	NED	2018-08-31 21:20:00	5.25976	-6.53815	583.465
3	NED	2018-09-01 04:01:00	5.91944	-5.32796	375.759
3	Ex	2018-09-01 08:45:00	6.43582	-3.92742	198.203
3	Ex	2018-09-01 10:40:00	7.36111	-8.95307	787.35
3	NED	2018-09-01 18:12:00	5.74192	-5.10229	356.206
3	NED	2018-09-01 23:09:00	43.7031	-29.9288	1677.69
3	NED	2018-09-02 00:15:00	14.6279	-11.6777	747.152
3	NED	2018-09-02 01:14:00	9.31989	-6.08027	326.291
3	NED	2018-09-02 02:34:00	5.47352	-7.52152	716.445
3	NED	2018-09-02 08:04:00	7.42596	-7.64688	597.728
3	NED	2018-09-02 14:38:00	4.96723	-7.27893	721.53
3	Ex	2018-09-02 16:21:00	7.70914	-6.00657	376.552
3	Er	2018-09-02 16:48:00	5.48653	-5.4091	409.279
3	Ex	2018-09-02 17:33:00	12.2049	-8.04286	435.559
3	NED	2018-09-03 01:54:00	6.51426	-5.05539	315.858
3	Ex	2018-09-03 06:55:00	5.01065	-4.20069	279.836
3	NED	2018-09-03 08:25:00	6.67991	-5.83599	401.956
3	NED	2018-09-04 06:58:00	25.6692	-17.4979	976.841
3	NED	2018-09-04 08:03:00	5.71959	-6.85781	597.259
3	NED	2018-09-04 15:10:00	7.18412	-6.34063	440.274
3	Ex	2018-09-04 17:52:00	1.70679	-4.41963	585.788
3	Ex	2018-09-05 11:55:00	15.4159	-11.5994	705.931
3	NED	2018-09-05 14:59:00	7.6422	-7.48525	563.576
3	NED	2018-09-05 16:10:00	9.78778	-7.41309	453.689
3	NED	2018-09-06 07:09:00	7.41505	-5.78936	363.566
3	NED	2018-09-06 16:00:00	8.92529	-12.9697	1279.07
3	NED	2018-09-07 15:49:00	4.82952	-5.84213	511.878
3	Ex	2018-09-09 03:40:00	3.81684	-7.08457	802.87
3	NED	2018-09-09 06:40:00	12.8204	-7.53052	366.666
3	Er	2018-09-09 12:16:00	1.16845	-2.04266	224.178
3	NED	2018-09-10 02:14:00	3.07514	-6.59768	803.959
3	Er	2018-09-10 13:39:00	8.26105	-5.92734	346.207
3	Er	2018-09-10 15:22:00	8.36118	-7.40851	516.034
3	NED	2018-09-10 20:32:00	4.94172	-6.12756	545.915
3	Ex	2018-09-10 21:05:00	3.88934	-5.10304	471.896
3	Er	2018-09-11 07:31:00	9.79611	-6.44396	348.406
3	Ex	2018-09-11 12:30:00	-	-	-
3	Ex	2018-09-11 14:33:00	2.93605	-3.38109	286.383
3	Ex	2018-09-11 18:37:00	-	-	-
3	Ex	2018-09-12 03:33:00	8.86722	-5.97847	330.491
3	Ex	2018-09-12 08:51:00	-	-	-
3	NED	2018-09-13 05:39:00	8.71666	-7.23599	478.169
3	Er	2018-09-13 07:36:00	6.81996	-4.1272	206.667
3	Er	2018-09-13 22:52:00	8.04745	-9.71189	849.581
3	Ex	2018-09-14 02:04:00	2.00907	-2.99761	300.399
3	Ex	2018-09-14 09:11:00	6.99879	-7.54507	609.852
3	Er	2018-09-14 14:36:00	-	-	-
3	Er	2018-09-14 18:21:00	5.98861	-4.95155	326.139
3	Ex	2018-09-14 22:42:00	8.34034	-8.97638	724.67
3	NED	2018-09-15 09:06:00	6.52245	-6.6329	513.677
3	NED	2018-09-15 22:47:00	4.71832	-6.60432	636.406
3	NED	2018-09-16 04:09:00	5.15867	-6.5751	596.602
3	Er	2018-09-16 07:33:00	17.4362	-12.6202	742.756
3	Er	2018-09-16 14:38:00	4.31876	-5.48383	496.346
3	NED	2018-09-16 15:31:00	3.96695	-5.87624	586.314
3	Ex	2018-09-17 06:48:00	6.2952	-7.7259	683.573
3	Ex	2018-09-17 11:00:00	3.93704	-4.63696	398.927
3	Ex	2018-09-17 18:54:00	6.02748	-6.52852	529.475
3	Er	2018-09-17 20:58:00	7.596	-6.39205	427.12
3	Er	2018-09-17 22:57:00	12.5493	-9.24312	552.298
3	NED	2018-09-18 03:16:00	8.03038	-7.15254	500.269
3	Ex	2018-09-18 08:15:00	-	-	-
3	NED	2018-09-18 18:21:00	5.47373	-5.18661	380.748
3	Er	2018-09-19 22:33:00	-	-	-
3	Ex	2018-09-19 23:49:00	1.76117	-3.59709	427.985
3	NED	2018-09-20 02:28:00	6.23155	-5.3604	364.623
3	Ex	2018-09-20 06:24:00	-	-	-
3	Ex	2018-09-20 15:11:00	10.1276	-7.16551	413.42
3	Ex	2018-09-20 17:11:00	3.94721	-2.95574	179.143
3	Ex	2018-09-20 20:28:00	-	-	-
3	Ex	2018-09-21 06:03:00	-	-	-
3	Ex	2018-09-21 08:13:00	7.95227	-5.14617	274.136
3	NED	2018-09-21 09:45:00	6.22874	-6.59137	525.638
3	NED	2018-09-21 18:12:00	5.28099	-7.63158	750.071
3	NED	2018-09-21 18:53:00	8.37178	-8.07531	600.966
3	NED	2018-09-22 00:44:00	12.53	-8.2584	447.295
3	NED	2018-09-22 03:15:00	11.5318	-5.93845	254.576
3	NED	2018-09-22 04:34:00	10.4756	-8.91361	601.004
3	Ex	2018-09-22 07:43:00	24.1037	-16.9708	974.954
3	Er	2018-09-22 12:23:00	21.5749	-15.578	914.9
3	Er	2018-09-22 12:50:00	2.00421	-3.10713	318.553
3	Ex	2018-09-22 20:25:00	4.84502	-5.40769	448.081
3	Er	2018-09-22 23:51:00	3.22458	-4.05838	365.179
3	NED	2018-09-23 01:20:00	6.06386	-5.57138	399.328
3	Er	2018-09-23 07:33:00	0.00758	-2.32593	500.683
3	Er	2018-09-24 04:48:00	1.2408	-4.73921	723.265
3	Er	2018-09-24 05:42:00	3.7975	-3.19689	213.688
3	NED	2018-09-24 15:00:00	5.76185	-7.03516	620.308
3	NED	2018-09-24 17:48:00	6.21872	-5.75169	414.391
3	NED	2018-09-25 12:18:00	7.96157	-5.72808	335.366
3	NED	2018-09-25 21:16:00	7.96892	-6.14704	382.107
3	NED	2018-09-26 05:10:00	5.1959	-5.43985	430.428
3	Ex	2018-09-29 06:49:00	-	-	-
	NED	2018-10-04 10:33:00	3.19322	-5.58223	612.633
	NED	2018-10-09 09:43:00	6.50138	-5.22794	336.514
	NED	2018-10-16 18:54:00	9.18835	-5.84838	306.863
	NED	2018-10-21 09:04:00	4.67429	-6.02646	550.96
4	Er	2018-10-23 07:16:00	0.12593	-1.93675	381.173
4	Er	2018-10-23 10:00:00	1.3461	-4.00758	561.452
4	Er	2018-10-23 10:29:00	13.0636	-11.1182	749.785
4	Er	2018-10-23 15:00:00	4.28222	-5.86607	557.653
4	Er	2018-10-24 00:20:00	4.78748	-4.51767	330.588
4	Er	2018-10-25 06:11:00	1.85551	-0.44117	18.3658
4	Er	2018-10-25 16:22:00	4.47117	-2.9427	159.178
4	NED	2018-10-26 20:17:00	37.7898	-26.4083	1507.14
4	NED	2018-10-27 15:34:00	3.47757	-7.77171	965.361
4	NED	2018-10-28 07:50:00	5.61766	-8.3667	837.543
4	NED	2018-10-28 15:33:00	5.16471	-8.19314	851.347
4	Er	2018-10-30 10:22:00	1.07261	-3.72341	550.955
4	NED	2018-10-30 17:15:00	12.806	-13.166	1027.92
4	NED	2018-10-30 20:05:00	9.06097	-8.7303	649.154
4	NED	2018-11-02 15:40:00	8.2426	-8.18129	622.194
4	Er	2018-11-02 15:46:00	18.6116	-13.306	774.741
4	Ex	2018-11-03 23:55:00	25.3675	-18.8417	1134.01
4	NED	2018-11-04 07:43:00	7.81129	-6.34065	411.335
4	NED	2018-11-05 06:01:00	5.40091	-5.86815	476.987
4	NED	2018-11-07 16:53:00	5.3563	-5.60723	443.64
4	Ex	2018-11-14 00:42:00	115.654	-128.91	10671.2
4	Er	2018-11-14 14:03:00	-	-	-
4	NED	2018-11-15 02:01:00	5.46494	-6.66978	587.922
4	NED	2018-11-18 12:53:00	5.22329	-9.97682	1147.61
4	NED	2018-11-18 21:24:00	4.31892	-6.37562	634.817
4	Ex	2018-11-19 09:33:00	73.7496	-54.9335	3314.33
4	Er	2018-11-19 10:02:00	12.1962	-11.2651	810.768
4	Er	2018-11-19 22:20:00	25.5005	-19.3254	1183.35
4	NED	2018-11-20 02:12:00	9.46076	-6.75844	393.24
4	NED	2018-11-20 04:00:00	8.05041	-6.16533	380.91
4	NED	2018-11-20 12:11:00	5.47148	-6.3007	533.669
4	NED	2018-11-20 21:09:00	3.13634	-5.94646	681.399
4	NED	2018-11-21 02:54:00	6.08666	-8.81877	868.138
4	NED	2018-11-21 05:57:00	15.1256	-8.70722	415.93
4	NED	2018-11-21 16:05:00	6.1223	-5.75482	419.854
4	Er	2018-11-21 16:26:00	10.4491	-13.432	1225.61
4	Ex	2018-11-22 21:35:00	-	-	-
4	Ex	2018-11-27 09:01:00	15.1365	-20.5583	1943.77
4	NED	2018-11-28 17:50:00	1.88877	-6.75254	1008.98
4	NED	2018-11-28 22:17:00	4.61583	-5.98101	548.602
4	NED	2018-11-29 00:22:00	6.77757	-5.50041	356.765
4	NED	2018-11-29 02:06:00	5.4118	-6.56389	576.153
4	Er	2018-11-29 02:23:00	5.71464	-3.36185	163.928
4	NED	2018-11-29 04:47:00	6.53449	-5.4319	359.352
4	NED	2018-11-29 06:34:00	11.876	-7.73869	414.843
4	Er	2018-11-29 10:19:00	12.4221	-8.58389	485.043
4	Er	2018-11-29 10:48:00	9.95356	-11.1358	924.263
4	NED	2018-11-29 12:06:00	7.27896	-8.46563	721.999
4	Er	2018-11-29 12:12:00	10.0855	-7.56109	458.728
4	Er	2018-11-29 12:42:00	7.84703	-8.1679	643.538
4	NED	2018-11-29 20:38:00	10.3903	-7.86312	480.901
4	NED	2018-11-29 23:34:00	10.2394	-7.22782	416.168
4	NED	2018-11-30 07:49:00	8.83792	-7.20305	468.846
4	NED	2018-11-30 09:42:00	8.51309	-7.65977	540.063
4	Ex	2018-12-01 02:18:00	11.5486	-19.5481	2107.54
4	NED	2018-12-01 13:13:00	6.57919	-5.15852	325.105
4	Er	2018-12-01 14:03:00	7.63772	-4.41987	212.187
4	Er	2018-12-01 17:44:00	3.37049	-6.68029	783.023
4	NED	2018-12-02 12:01:00	6.24491	-5.20689	345.319
4	Er	2018-12-02 12:15:00	31.2931	-26.0117	1720.76
4	NED	2018-12-02 13:14:00	9.6715	-7.89492	514.553
4	NED	2018-12-02 14:50:00	19.9526	-11.0406	507.774
4	NED	2018-12-02 19:21:00	7.80157	-6.14742	389.048
4	NED	2018-12-03 02:44:00	19.6835	-10.2828	447.107
4	NED	2018-12-03 15:50:00	18.1145	-11.5713	609.147
4	NED	2018-12-03 17:42:00	26.7924	-15.1695	713.236
4	NED	2018-12-03 20:02:00	9.31956	-14.001	1408.89
4	NED	2018-12-04 12:46:00	4.5405	-7.0454	722.695
4	Ex	2018-12-04 19:31:00	3.26505	-6.0289	681.365
4	NED	2018-12-05 00:56:00	6.21537	-5.86822	429.593
4	NED	2018-12-05 12:56:00	3.83381	-6.56576	712.484
4	Er	2018-12-05 13:16:00	8.77552	-7.03664	451.869
4	NED	2018-12-05 18:53:00	7.96933	-6.0083	366.281
4	NED	2018-12-11 01:50:00	8.29884	-6.21248	376.433
4	NED	2018-12-13 11:15:00	5.94504	-8.18083	779.931
4	Er	2018-12-13 13:19:00	17.5892	-14.0481	899.147
4	NED	2018-12-13 23:12:00	4.8333	-7.38033	749.908
4	NED	2018-12-14 11:33:00	8.34815	-5.87612	337.495
4	NED	2018-12-14 12:24:00	7.56117	-7.3877	555.196
4	Ex	2018-12-14 12:41:00	19.3875	-17.9625	1295.88
4	Ex	2018-12-15 03:00:00	19.4593	-13.7719	794.791
4	NED	2018-12-15 07:58:00	4.48237	-6.27968	605.462
4	Ex	2018-12-15 09:28:00	5.0778	-4.15612	271.473
4	Ex	2018-12-15 09:48:00	19.9711	-16.6332	1102.11
4	Er	2018-12-15 12:40:00	1.3371	-7.07845	1181.16
4	Er	2018-12-15 13:23:00	12.1994	-6.24532	266.173
4	Ex	2018-12-16 03:56:00	6.22957	-5.90464	433.562
4	Er	2018-12-16 04:26:00	21.6327	-13.5521	700.756
4	NED	2018-12-16 07:28:00	9.9661	-6.27264	325.749
4	NED	2018-12-16 11:41:00	6.8426	-5.66613	373.665
4	NED	2018-12-16 12:34:00	11.2266	-7.70552	432.805
4	Ex	2018-12-16 12:59:00	17.4507	-15.2672	1052.7
4	NED	2018-12-16 13:16:00	8.18566	-7.00196	474.133
4	Ex	2018-12-17 00:43:00	10.4697	-4.81896	200.612
4	NED	2018-12-17 03:10:00	5.15466	-6.35289	563.689
4	Ex	2018-12-17 08:24:00	10.8308	-9.49298	655.517
4	Ex	2018-12-17 08:35:00	8.49103	-7.47587	518.095
4	NED	2018-12-17 09:06:00	16.1157	-16.1901	1242.48
4	Er	2018-12-17 11:19:00	19.408	-12.7019	683.598
4	NED	2018-12-17 12:58:00	30.6572	-21.0877	1186.75
4	NED	2018-12-17 13:49:00	6.25923	-5.41853	370.467
4	Ex	2018-12-18 00:49:00	7.63365	-8.65672	725.392
4	NED	2018-12-18 15:51:00	5.22429	-5.42927	427.265
4	NED	2018-12-18 16:46:00	12.0475	-6.55606	296.688
4	NED	2018-12-18 20:05:00	3.71084	-7.66275	916.644
4	Ex	2018-12-19 09:58:00	11.694	-8.93212	550.614
4	Ex	2018-12-19 10:35:00	19.6303	-14.4694	865.14
4	Ex	2018-12-19 12:13:00	17.9769	-17.0748	1255.76
4	Er	2018-12-19 15:42:00	9.19838	-13.0607	1269.82
4	Ex	2018-12-19 16:23:00	19.6749	-14.6518	883.821
4	Ex	2018-12-19 17:59:00	7.7223	-6.68334	456.847
4	Ex	2018-12-19 20:23:00	19.4597	-11.527	565.734
4	NED	2018-12-19 21:24:00	7.73888	-5.24636	291.444
4	Er	2018-12-19 23:23:00	11.4214	-7.83893	440.284
4	Er	2018-12-20 02:20:00	15.589	-12.965	858.059
4	Ex	2018-12-20 03:07:00	0.068388	-2.21908	458.654
4	NED	2018-12-20 04:46:00	7.75347	-7.32864	536.971
4	Ex	2018-12-20 05:32:00	11.1142	-8.67782	544.976
4	Ex	2018-12-20 06:44:00	10.3272	-11.0254	884.905
4	Ex	2018-12-20 07:03:00	15.798	-11.5296	683.473
4	Ex	2018-12-20 08:34:00	2.3332	-0.27301	11.3653
4	Er	2018-12-20 08:44:00	16.5352	-9.71354	473.007
4	Ex	2018-12-20 09:46:00	16.8509	-12.6341	766.556
4	Er	2018-12-20 10:16:00	16.4775	-7.59096	342.976
4	NED	2018-12-20 13:44:00	8.83564	-5.83677	316.785
4	Ex	2018-12-20 14:43:00	1.73566	-9.53246	1604.43
4	Er	2018-12-20 15:05:00	5.70411	-6.97265	615.273
4	NED	2018-12-20 15:43:00	2.23471	-5.7794	765.613
4	NED	2018-12-20 17:37:00	10.1753	-5.58519	254.875
4	Er	2018-12-20 18:10:00	7.08023	-6.0308	406.975
4	Ex	2018-12-20 18:20:00	7.95498	-11.0322	1056.95
4	Er	2018-12-20 19:58:00	7.80673	-11.548	1151.26
4	NED	2018-12-20 21:16:00	11.8353	-5.27896	246.351
4	NED	2018-12-20 23:29:00	3.18923	-7.00369	862.889
4	Ex	2018-12-21 02:57:00	14.4457	-11.6638	753.339
4	Ex	2018-12-21 05:20:00	3.93451	-5.88015	589.853
4	Ex	2018-12-21 05:57:00	0.864227	-4.44782	737.158
4	NED	2018-12-21 07:16:00	10.5463	-11.7553	973.119
4	NED	2018-12-21 09:02:00	10.5016	-8.61394	563.65
4	Ex	2018-12-21 09:56:00	17.2669	-14.5241	970.183
4	Ex	2018-12-21 11:33:00	13.3684	-10.959	716.748
4	NED	2018-12-21 13:03:00	7.41626	-5.65091	347.623
4	NED	2018-12-21 13:40:00	6.24193	-6.64972	532.882
4	NED	2018-12-21 15:07:00	8.94425	-8.30606	600.313
4	Ex	2018-12-21 17:31:00	17.5049	-13.8227	876.344
4	Er	2018-12-21 17:55:00	10.1561	-6.5397	346.794
4	Ex	2018-12-21 18:21:00	-	-	-
4	NED	2018-12-21 18:47:00	4.71713	-6.82889	671.912
4	NED	2018-12-21 19:51:00	10.6126	-6.55366	334.412
4	Ex	2018-12-22 00:30:00	24.93	-20.4211	1334.75
4	Er	2018-12-22 00:52:00	9.01771	-10.3117	869.13
4	NED	2018-12-22 06:00:00	6.0467	-7.84686	720.452
4	NED	2018-12-22 06:54:00	10.5893	-7.37672	419.822
4	NED	2018-12-22 07:40:00	16.0372	-6.15901	333.811
4	NED	2018-12-22 09:19:00	12.7466	-5.51546	265.318
4	Ex	2018-12-22 11:20:00	6.30514	-8.32062	772.32
4	NED	2018-12-22 12:03:00	6.35881	-5.05895	322.749
4	NED	2018-12-22 13:08:00	10.567	-6.68837	349.139
4	Ex	2018-12-22 15:14:00	20.4685	-15.8849	992.498
4	NED	2018-12-22 16:08:00	7.756	-7.112	508.963
4	NED	2018-12-22 16:44:00	7.32414	-7.03852	522.32
4	NED	2018-12-22 17:30:00	14.0893	-6.39844	293.266
4	NED	2018-12-22 18:43:00	7.22249	-6.87511	506.485
4	NED	2018-12-22 20:02:00	13.4011	-5.76297	278.941
4	NED	2018-12-22 20:33:00	12.3855	-10.275	678.628
4	Er	2018-12-22 22:12:00	10.4111	-5.82895	271.131
4	NED	2018-12-22 23:29:00	11.9277	-6.66998	309.892
4	NED	2018-12-23 01:09:00	11.3405	-6.56319	315.107
4	NED	2018-12-23 05:48:00	2.98229	-8.48389	1168.01
4	NED	2018-12-23 06:36:00	5.85968	-5.38012	385.414
4	NED	2018-12-23 08:16:00	11.9689	-7.17519	356.137
4	NED	2018-12-23 21:02:00	7.05377	-6.27327	438.248
4	NED	2018-12-23 21:49:00	13.7462	-9.33487	519.365
4	NED	2018-12-24 00:42:00	7.9488	-5.40591	301.166
4	Ex	2018-12-24 11:27:00	47.8773	-30.6704	1618.77
4	Ex	2018-12-25 20:21:00	9.56588	-6.22774	333.572
4	Ex	2018-12-28 11:15:00	6.98674	-7.39986	590.482
4	Ex	2018-12-29 06:49:00	0.756412	-2.24552	314.251
4	Ex	2019-01-03 05:51:00	4.19521	-5.51028	509.91
4	Ex	2019-01-03 19:32:00	3.49659	-4.16351	360.897
4	NED	2019-01-06 06:37:00	2.75665	-4.2955	441.711
4	NED	2019-01-06 08:34:00	2.13969	-7.25199	1064.42
4	Ex	2019-01-06 10:21:00	15.1794	-8.87814	430.541
4	NED	2019-01-06 19:41:00	7.09044	-7.32827	574.381
4	NED	2019-01-06 22:16:00	8.41437	-4.71655	219.636
4	Er	2019-01-07 00:15:00	4.43957	-4.31159	322.538
4	NED	2019-01-07 07:31:00	6.88575	-6.13685	429.44
4	NED	2019-01-08 21:35:00	13.1572	-8.01934	404.251
4	NED	2019-01-09 04:42:00	5.69215	-7.27296	660.997
4	Ex	2019-01-09 18:27:00	16.1899	-19.7552	1741.13
4	NED	2019-01-12 13:08:00	5.99779	-5.03363	335.615
4	NED	2019-01-13 07:08:00	8.17857	-6.7502	443.957
4	NED	2019-01-14 09:19:00	9.02634	-6.72187	405.475
4	NED	2019-01-14 17:23:00	2.96748	-5.53819	629.423
4	NED	2019-01-14 22:00:00	8.26959	-6.58188	420.055
4	NED	2019-01-16 14:01:00	7.5186	-1.37694	57.3217
4	Ex	2019-01-17 00:50:00	8.30774	-10.0899	886.458
4	NED	2019-01-17 18:45:00	6.24883	-7.57182	664.192
4	NED	2019-01-17 20:20:00	1.96557	-3.94693	465.669
4	NED	2019-01-18 07:00:00	9.29202	-6.57495	379.381
4	NED	2019-01-18 16:00:00	13.6161	-4.60905	191.874
4	Er	2019-01-19 04:01:00	5.32343	-5.18375	388.567
4	NED	2019-01-19 06:05:00	2.68113	-7.22948	974.323
4	NED	2019-01-19 09:44:00	4.71764	-4.72139	361.302
4	NED	2019-01-19 10:41:00	8.31272	-6.00511	352.836
4	NED	2019-01-19 14:20:00	4.05024	-5.83923	573.079
4	NED	2019-01-19 18:28:00	10.3015	-4.24364	176.662
4	NED	2019-01-20 01:38:00	8.42014	-6.00844	349.264
4	NED	2019-01-20 14:03:00	2.97602	-5.21688	573.398
4	NED	2019-01-20 19:09:00	5.22889	-6.87341	636.377
4	NED	2019-01-20 20:00:00	10.6909	-7.12112	389.393
4	NED	2019-01-21 03:03:00	6.72534	-5.47027	355.47
4	NED	2019-01-21 08:39:00	5.50384	-6.72237	592.862
4	NED	2019-01-21 12:02:00	2.92654	-2.32144	147.738
4	NED	2019-01-21 16:21:00	6.48426	-4.03547	207.403
4	NED	2019-01-21 17:24:00	7.78313	-6.30025	407.774
4	NED	2019-01-21 18:22:00	5.34903	-5.71233	458.57
4	NED	2019-01-21 23:09:00	5.89887	-6.12445	481.633
4	NED	2019-01-22 00:24:00	7.07287	-5.24698	315.465
4	NED	2019-01-22 03:18:00	5.46448	-6.85894	616.071
4	Er	2019-01-22 07:45:00	-	-	-
4	NED	2019-01-22 08:33:00	4.49102	-5.72135	518.97
4	NED	2019-01-23 05:15:00	3.12398	-6.42435	766.951
4	NED	2019-01-23 07:37:00	6.01958	-4.93839	323.187
4	Ex	2019-01-23 10:20:00	12.7032	-8.33049	449.146
4	NED	2019-01-23 14:19:00	1.37115	-4.02422	560.736
4	NED	2019-01-23 20:59:00	2.95853	-4.27909	420.795
4	NED	2019-01-23 22:12:00	7.36795	-4.96304	274.131
4	NED	2019-01-23 23:02:00	5.26551	-5.07102	376.931
4	NED	2019-01-23 23:50:00	2.4796	-3.98596	417.358
4	NED	2019-01-24 04:52:00	4.85971	-3.68151	225.357
4	NED	2019-01-24 08:26:00	2.29985	-5.14262	638.956
4	NED	2019-01-25 07:13:00	3.90031	-2.23594	106.385
4	NED	2019-01-25 11:08:00	9.67274	-6.38894	346.714
4	NED	2019-01-25 16:05:00	4.44605	-4.43209	338.162
4	NED	2019-01-25 18:30:00	2.46834	-7.13954	989.281
4	NED	2019-01-25 22:44:00	10.6113	-3.27236	136.228
4	NED	2019-01-26 03:59:00	4.0367	-8.3132	993.142
4	NED	2019-01-26 08:43:00	2.12813	-5.93655	811.036
4	Ex	2019-01-26 16:06:00	18.2568	-8.54793	380.012
4	NED	2019-01-27 00:41:00	4.78782	-4.27215	299.234
4	NED	2019-01-27 04:58:00	4.67631	-2.92894	151.423
4	NED	2019-01-27 07:08:00	4.15782	-4.45673	358.738
4	NED	2019-01-27 08:31:00	4.64645	-7.46195	780.884
4	Ex	2019-01-27 12:52:00	11.4087	-5.02014	208.987
4	NED	2019-01-27 16:48:00	5.97824	-4.90717	321.289
4	NED	2019-01-27 19:27:00	7.63504	-5.98169	376.735
4	NED	2019-01-27 23:50:00	6.21409	-7.58686	668.925
4	NED	2019-01-28 13:04:00	3.4731	-4.59909	427.837
4	NED	2019-01-28 17:19:00	3.1796	-3.86232	339.367
4	NED	2019-01-29 10:34:00	6.39268	-3.68917	176.643
4	NED	2019-01-29 12:19:00	4.71388	-6.03274	548.864
4	NED	2019-01-29 15:58:00	3.93052	-6.85859	751.959
4	NED	2019-01-29 23:08:00	3.71769	-6.38484	693.929
4	NED	2019-01-30 05:28:00	6.3185	-5.4257	368.544
4	NED	2019-01-30 15:47:00	1.42388	-2.95551	354.444
4	NED	2019-01-30 20:17:00	6.6006	-2.94094	122.431
4	NED	2019-01-31 10:06:00	4.62016	-6.76859	670.837
4	NED	2019-01-31 16:19:00	6.31997	-10.1719	1065.82
4	NED	2019-01-31 18:16:00	4.88692	-3.88341	247.512
4	NED	2019-01-31 21:03:00	4.78187	-7.06991	704.604
4	NED	2019-02-01 02:06:00	4.21256	-6.17451	612.143
4	NED	2019-02-01 04:02:00	3.63455	-3.20603	222.518
4	Ex	2019-02-01 14:00:00	-2.1392	-6.15583	0
4	NED	2019-02-01 14:32:00	9.33905	-5.24271	244.49
4	NED	2019-02-01 20:46:00	6.53071	-7.85674	685.829
4	NED	2019-02-01 22:11:00	5.1589	-5.63192	459.351
4	NED	2019-02-02 00:25:00	6.53684	-3.10235	129.15
4	NED	2019-02-02 04:20:00	5.13077	-7.14837	686.833
4	NED	2019-02-02 10:05:00	8.83408	-6.44394	381.824
4	NED	2019-02-02 14:59:00	5.26662	-6.34019	553.697
4	NED	2019-02-02 15:38:00	5.26226	-5.63176	452.807
4	NED	2019-02-02 22:10:00	6.94137	-4.79318	270.673
4	Ex	2019-02-03 02:28:00	12.0255	-14.4863	1265.66
4	NED	2019-02-03 05:25:00	3.51625	-8.09607	1019.51
4	Ex	2019-02-03 09:43:00	-	-	-
4	NED	2019-02-03 23:29:00	6.5012	-8.40029	769.089
4	Ex	2019-02-04 01:32:00	-	-	-
4	NED	2019-02-04 02:55:00	7.94167	-7.924	605.005
4	NED	2019-02-04 06:51:00	10.8512	-8.75201	564.761
4	NED	2019-02-04 19:17:00	14.6146	-9.50618	508.76
4	NED	2019-02-05 07:21:00	6.12348	-6.40098	505.899
4	NED	2019-02-05 08:53:00	2.83648	-6.12699	749.013
4	NED	2019-02-05 19:07:00	5.24889	-6.9181	641.62
4	NED	2019-02-06 10:45:00	9.06655	-5.70611	296.311
4	NED	2019-02-07 03:20:00	11.8277	-10.1357	687.342
4	NED	2019-02-07 03:26:00	14.4842	-10.1918	585.192
4	NED	2019-02-07 07:06:00	5.2997	-6.41464	562.263
4	NED	2019-02-07 14:13:00	6.50558	-5.57877	378.527
4	NED	2019-02-07 16:00:00	3.77228	-7.49753	880.048
4	NED	2019-02-07 16:37:00	5.1748	-5.65304	461.294
4	Ex	2019-02-07 19:19:00	13.7101	-7.41652	333.687
4	NED	2019-02-07 22:00:00	2.81022	-6.64758	847.343
4	NED	2019-02-08 01:31:00	3.83842	-7.3969	854.736
4	NED	2019-02-08 02:13:00	18.9304	-11.0059	530.703
4	NED	2019-02-08 05:15:00	7.84511	-7.12389	505.929
4	NED	2019-02-08 13:34:00	9.48476	-3.7688	156.894
4	Ex	2019-02-08 16:22:00	0.807648	-4.65921	792.975
4	Ex	2019-02-08 18:15:00	15.6669	-13.2589	890.066
4	Er	2019-02-08 20:08:00	4.99495	-9.47735	1086.42
4	Ex	2019-02-09 08:14:00	-	-	-
4	NED	2019-02-10 00:48:00	6.72353	-6.00913	421.44
4	NED	2019-02-10 04:13:00	6.70875	-5.23868	329.025
4	NED	2019-02-10 06:17:00	8.53043	-7.36184	502.079
4	NED	2019-02-10 07:30:00	5.3822	-5.87395	478.99
4	NED	2019-02-10 08:07:00	6.47663	-5.3214	348.687
4	NED	2019-02-10 11:24:00	5.21376	-5.19344	396.025
4	NED	2019-02-10 13:54:00	12.0723	-9.50769	601.445
4	Ex	2019-02-10 15:18:00	15.3443	-15.7564	1229.06
4	NED	2019-02-10 20:24:00	5.38418	-8.37698	860.64
4	NED	2019-02-10 23:37:00	6.89429	-6.52476	478.536
4	NED	2019-02-11 01:41:00	5.47445	-5.2895	394.153
4	NED	2019-02-11 02:49:00	7.74123	-7.11493	510.096
4	NED	2019-02-11 08:49:00	22.585	-11.9155	523.153
4	Ex	2019-02-11 10:44:00	8.85798	-3.7714	157.003
4	NED	2019-02-11 11:22:00	9.53427	-6.37937	350.248
4	NED	2019-02-11 12:16:00	12.5791	-9.3452	562.56
4	NED	2019-02-11 18:04:00	4.5765	-6.50204	632.392
4	NED	2019-02-11 19:07:00	10.2393	-6.76567	367.281
4	NED	2019-02-12 04:28:00	8.95762	-10.3972	885.507
4	NED	2019-02-12 12:26:00	6.33993	-2.41145	100.388
4	NED	2019-02-12 18:40:00	6.83047	-5.82118	393
4	Ex	2019-02-13 07:00:00	-	-	-
4	Ex	2019-02-13 09:26:00	12.9575	-9.93864	614.836
4	Ex	2019-02-14 06:24:00	10.7987	-11.8471	969.699
4	Ex	2019-02-17 06:08:00	32.1682	-27.0038	1800.83
4	Er	2019-02-17 06:40:00	18.8491	-11.1142	543.121
4	NED	2019-02-17 23:30:00	6.96318	-6.58604	482.808
4	NED	2019-02-18 11:26:00	5.2043	-5.51226	439.873
4	NED	2019-02-18 14:25:00	7.37352	-6.56008	458.42
4	NED	2019-02-18 15:37:00	6.60425	-9.72819	967.363
4	NED	2019-02-19 10:26:00	3.71776	-8.24652	1020.78
4	NED	2019-02-20 03:28:00	0.56873	-6.9758	1341.6
4	NED	2019-02-20 07:34:00	6.07747	-5.13261	343.968
4	NED	2019-02-20 22:06:00	14.0199	-7.81145	361.654
4	NED	2019-02-21 07:46:00	5.84534	-7.13719	629.31
4	NED	2019-02-21 10:38:00	11.6214	-7.78023	427.377
4	NED	2019-02-21 11:52:00	9.35253	-9.74272	768.066
4	NED	2019-02-21 20:05:00	7.19115	-5.90279	386.477
4	Ex	2019-02-22 00:59:00	18.2202	-11.3909	587.888
4	NED	2019-02-23 12:37:00	9.19481	-5.25445	249.25
4	NED	2019-02-23 21:17:00	17.919	-15.3239	1037.43
4	NED	2019-02-24 00:16:00	11.9722	-9.76576	636.097
4	NED	2019-02-24 01:42:00	6.38929	-7.01939	575.115
4	Er	2019-02-24 03:15:00	-3.25419	-3.47673	0
4	NED	2019-02-24 03:29:00	8.63249	-5.89703	329.832
4	NED	2019-02-24 04:18:00	10.8402	-6.50742	323.405
4	NED	2019-02-24 05:22:00	6.67073	-7.24876	589.264
4	NED	2019-02-24 07:22:00	6.14623	-6.02183	453.497
4	NED	2019-02-24 15:27:00	4.4664	-5.29194	457.15
4	NED	2019-02-24 16:33:00	10.2589	-9.78738	722.271
4	NED	2019-02-24 18:56:00	9.40345	-7.51242	480.943
4	NED	2019-02-24 19:47:00	10.2696	-7.00431	391.212
4	NED	2019-02-24 22:13:00	13.3945	-10.5521	667.683
4	NED	2019-02-25 01:31:00	9.85759	-6.28027	329.809
4	Ex	2019-02-25 12:46:00	5.44253	-11.2372	1344.15
4	NED	2019-02-26 11:00:00	2.21319	-7.46616	1094.11
4	NED	2019-02-26 16:24:00	6.35395	-7.99546	719.355
4	NED	2019-02-26 18:02:00	6.91946	-7.4303	598.873
4	NED	2019-02-26 18:40:00	5.23343	-7.77947	777.856
4	NED	2019-02-26 23:27:00	9.59016	-6.91902	406.077
4	NED	2019-02-27 01:34:00	7.21155	-6.30741	434.809
4	NED	2019-02-27 03:03:00	5.8514	-7.5251	686.836
4	Ex	2019-02-27 04:39:00	6.72402	-4.32633	229.256
4	Ex	2019-02-27 13:39:00	27.3424	-21.7734	1390.18
4	NED	2019-02-27 14:19:00	11.7493	-14.0743	1224.98
4	NED	2019-02-27 16:03:00	41.1471	-27.8156	1541.29
4	NED	2019-02-27 20:47:00	7.85496	-7.37306	537.329
4	Er	2019-03-01 06:22:00	8.42653	-7.25891	494.332
4	Ex	2019-03-01 12:09:00	18.3096	-20.5166	1704.75
4	Ex	2019-03-01 12:47:00	33.4361	-28.6061	1937.33
4	Er	2019-03-01 13:20:00	13.0292	-11.0702	745.534
4	NED	2019-03-02 14:33:00	5.05348	-7.31668	719.96
4	NED	2019-03-02 19:14:00	6.99442	-7.38996	588.646
4	Ex	2019-03-03 08:25:00	9.31711	-11.8174	1068.82
4	NED	2019-03-04 05:20:00	7.93345	-6.14688	383.533
4	NED	2019-03-04 13:24:00	8.17504	-5.38588	291.604
4	NED	2019-03-05 09:09:00	5.29	-6.3322	550.858
4	NED	2019-03-05 12:39:00	9.42683	-8.89088	650.34
4	Ex	2019-03-05 20:02:00	-	-	-
4	NED	2019-03-06 17:03:00	7.28549	-6.46107	450.356
4	NED	2019-03-06 17:52:00	3.45377	-3.41923	259.53
4	NED	2019-03-07 01:41:00	5.25767	-5.57704	445.522
4	NED	2019-03-07 06:13:00	5.25175	-9.21114	1012.71
4	NED	2019-03-07 07:33:00	2.71416	-5.05246	573.449
4	NED	2019-03-07 08:35:00	7.42283	-5.90269	376.43
4	NED	2019-03-08 23:10:00	6.29419	-3.53033	164.497
4	NED	2019-03-09 03:15:00	4.6374	-6.49645	626.337
4	Ex	2019-03-09 13:10:00	8.56855	-9.24685	747.957
4	Ex	2019-03-09 13:27:00	6.95371	-11.8028	1274.45
4	NED	2019-03-09 18:48:00	3.39109	-5.24411	536.855
4	NED	2019-03-10 06:42:00	6.83612	-5.98329	412.699
4	NED	2019-03-10 08:30:00	5.66308	-7.02004	625.31
4	Ex	2019-03-10 10:32:00	6.48162	-6.33286	475.92
4	NED	2019-03-10 12:22:00	9.3283	-8.20985	568.785
4	Er	2019-03-11 13:34:00	-3.98509	-9.00745	0
4	Er	2019-03-11 14:15:00	0.212829	-4.31524	868.417
4	NED	2019-03-11 16:51:00	4.91874	-6.52332	607.436
4	NED	2019-03-11 21:34:00	6.81942	-6.06377	423.553
4	NED	2019-03-12 00:22:00	11.9422	-5.96702	248.576
4	NED	2019-03-12 03:23:00	6.68907	-6.19356	446.612
4	NED	2019-03-12 20:00:00	11.1159	-8.55355	530.593
4	NED	2019-03-12 21:51:00	7.63371	-5.89824	367.156
4	Ex	2019-03-13 02:21:00	13.7556	-20.1244	1992.88
4	NED	2019-03-13 09:02:00	3.29304	0.44275
4	NED	2019-03-13 11:30:00	7.78313	-5.53897	321.217
4	NED	2019-03-13 15:37:00	8.42462	-5.28947	274.072
4	NED	2019-03-13 16:23:00	4.78326	-5.43765	456.435
4	NED	2019-03-13 17:13:00	7.61188	-6.95641	496.519
4	NED	2019-03-13 23:35:00	5.91851	-6.96766	599.263
4	NED	2019-03-14 06:00:00	2.88181	-2.20807	136.476
4	Ex	2019-03-14 11:31:00	7.16283	-5.89759	387.112
4	NED	2019-03-14 13:37:00	9.1806	-6.78199	406.278
4	NED	2019-03-14 14:04:00	6.2872	-3.895	199.339
4	NED	2019-03-14 14:38:00	1.41445	0.46259
4	Ex	2019-03-14 23:23:00	25.2321	-22.9817	1636.01
4	NED	2019-03-15 00:59:00	6.32573	-1.86872	77.7944
4	Er	2019-03-15 03:34:00	2.43678	-8.68882	1297.19
4	Er	2019-03-15 04:25:00	9.80018	-7.57599	471.794
4	Er	2019-03-15 06:16:00	5.36137	-5.54204	434.427
4	Er	2019-03-15 07:45:00	-2.07265	-5.0473	0
4	Er	2019-03-15 09:58:00	8.50283	-5.83926	328.142
4	Ex	2019-03-15 12:03:00	22.1454	-29.5651	2764.82
4	Er	2019-03-15 13:24:00	5.5992	-5.2953	388.151
4	Er	2019-03-15 14:33:00	7.42409	-8.20917	675.708
4	NED	2019-03-15 15:05:00	7.37202	-6.36208	433.894
4	NED	2019-03-15 16:37:00	9.41516	-7.55761	485.755
4	NED	2019-03-15 18:06:00	7.16679	-6.1871	422.077
4	NED	2019-03-16 07:36:00	7.17737	-6.76138	494.126
4	Ex	2019-03-17 13:50:00	34.6899	-42.3411	3732.45
4	Er	2019-03-18 11:56:00	0.735184	-4.73663	825.206
4	NED	2019-03-18 13:25:00	6.29415	-7.66481	674.62
4	NED	2019-03-18 16:31:00	7.72239	-7.29411	534.15
4	Er	2019-03-18 17:45:00	5.0245	-5.85228	499.629
4	Ex	2019-03-18 18:23:00	13.0848	-12.8487	969.268
4	Ex	2019-03-19 03:12:00	18.7431	-30.4987	3215.8
4	Ex	2019-03-19 05:34:00	10.3847	-9.94826	736.466
4	NED	2019-03-19 08:28:00	19.6808	-8.59179	357.674
4	NED	2019-03-19 12:47:00	4.87255	-6.00726	533.144
4	NED	2019-03-19 16:01:00	4.88899	-8.72351	968.071
4	NED	2019-03-19 17:44:00	3.50849	-6.51628	738.709
4	NED	2019-03-19 18:11:00	3.93039	-6.3382	664.866
4	NED	2019-03-19 18:30:00	8.63573	-7.07872	462.939
4	NED	2019-03-20 09:37:00	1.68456	-5.21242	740.791
4	NED	2019-03-24 08:31:00	4.28294	-4.54985	363.858
4	NED	2019-03-24 09:38:00	7.31398	-4.58025	236.758
4	NED	2019-03-24 10:35:00	7.88487	-8.96628	752.787
4	NED	2019-03-24 14:24:00	7.66154	-7.74003	596.479
4	NED	2019-03-24 14:47:00	9.63342	-8.45188	584.091
4	NED	2019-03-24 15:19:00	2.51609	-5.0922	603.141
4	NED	2019-03-28 09:26:00	18.5147	-10.9367	535.352
4	NED	2019-03-28 15:16:00	7.78384	-5.67783	336.429
4	NED	2019-03-28 22:49:00	5.16599	-6.11746	528.263
4	Er	2019-03-28 22:58:00	9.23042	-11.1387	974.342
4	Er	2019-03-28 23:25:00	-	-	-
4	NED	2019-03-28 23:38:00	11.5505	-9.3707	607.626
4	Er	2019-03-29 00:52:00	19.026	-10.8204	510.928
4	NED	2019-03-29 04:18:00	4.82454	-6.49496	610.641
4	NED	2019-03-29 14:09:00	8.37557	-6.06196	356.762
4	Er	2019-03-29 15:50:00	3.1625	-3.32814	264.337
4	NED	2019-03-30 12:46:00	2.89891	-1.84412	96.7107
4	NED	2019-04-01 16:54:00	13.9073	-11.5861	767.871
4	NED	2019-04-01 19:03:00	4.44784	-6.83641	697.344
4	NED	2019-04-01 20:21:00	16.162	-9.08696	424.392
4	NED	2019-04-02 00:14:00	6.75401	-7.47488	615.658
4	NED	2019-04-03 21:10:00	7.96772	-6.95427	478.602
4	NED	2019-04-04 05:14:00	6.36725	-4.44449	253.395
4	NED	2019-04-04 10:52:00	10.6868	-6.68721	345.421
4	NED	2019-04-04 21:55:00	14.7918	-9.17484	470.079
4	NED	2019-04-05 06:01:00	10.6016	-11.2269	895.77
4	NED	2019-04-05 09:49:00	13.2196	-6.55628	272.936
4	NED	2019-04-06 17:19:00	5.55672	-6.828	604.631
4	NED	2019-04-06 23:10:00	7.51816	-5.27823	302.465
4	Ex	2019-04-07 02:51:00	12.5212	-12.6908	980.383
4	NED	2019-04-07 04:14:00	9.57009	-6.61819	374.225
4	NED	2019-04-07 07:26:00	8.98658	-6.276	357.974
4	NED	2019-04-07 11:33:00	11.828	-5.58384	232.454
4	NED	2019-04-07 15:10:00	6.00369	-5.49252	392.358
4	Ex	2019-04-07 23:50:00	15.0711	-13.3509	929.787
4	NED	2019-04-08 03:51:00	13.7496	-7.41756	332.848
4	NED	2019-04-08 10:40:00	5.94311	-3.42409	163.694
4	NED	2019-04-08 14:48:00	10.4019	-6.22467	308.441
4	NED	2019-04-08 23:51:00	2.42585	-5.01788	600.759
4	NED	2019-04-09 01:18:00	7.31057	-6.55552	460.97
4	NED	2019-04-09 03:05:00	7.4851	-5.50339	328.34
4	NED	2019-04-09 06:10:00	6.15	-8.91555	877.968
4	NED	2019-04-09 06:16:00	4.45217	-8.00496	891.983
4	NED	2019-04-09 06:43:00	4.23012	-5.18968	459.066
4	NED	2019-04-10 17:11:00	4.2041	-2.38171	112.046
4	NED	2019-04-11 02:13:00	11.2512	-10.6288	778.434
4	NED	2019-04-11 22:53:00	5.49996	-4.54061	298.699
4	Ex	2019-04-13 11:20:00	-0.342456	-4.60564	0
4	Er	2019-04-13 15:42:00	-1.73555	-2.75618	0
4	Er	2019-04-13 16:53:00	-	-	-
4	NED	2019-04-14 13:39:00	3.32635	-7.0865	860.619
4	NED	2019-04-14 20:26:00	7.03879	-6.60397	481.111
4	NED	2019-04-16 12:11:00	9.24812	-9.9599	804.451
4	NED	2019-04-16 21:13:00	7.18359	-5.52622	342.727
4	Ex	2019-04-17 00:03:00	7.65859	-9.19872	802.087
4	NED	2019-04-18 06:00:00	4.01736	-7.79922	904.64
4	NED	2019-04-19 03:03:00	8.70285	-6.26381	366.855
4	NED	2019-04-19 03:24:00	4.65226	-3.85649	254.547
4	NED	2019-04-20 22:51:00	3.35655	-4.60173	437.683
4	NED	2019-04-21 03:59:00	4.95427	-4.21469	284.132
4	Er	2019-04-22 09:08:00	1.3457	-3.9569	551.748
4	Er	2019-04-22 13:15:00	5.28156	-1.87424	109.935
4	Er	2019-04-22 15:15:00	1.17056	-2.07446	229.362
4	NED	2019-04-23 11:12:00	1.99498	-5.4368	735.876
4	Ex	2019-04-25 06:38:00	14.6275	-12.4671	841.736
4	Ex	2019-04-29 18:05:00	8.12176	-3.6574	152.257
4	NED	2019-04-30 11:39:00	5.41514	-4.38674	284.104
4	Ex	2019-05-01 13:01:00	2.94331	-5.73138	665.813
4	Ex	2019-05-01 23:34:00	6.47273	-6.10424	446.478
4	Er	2019-05-02 18:22:00	3.73105	-6.69492	745.203
4	Ex	2019-05-04 09:00:00	9.59676	-5.68387	278.923
4	Er	2019-05-04 13:44:00	1.40784	-3.21339	403.049
4	NED	2019-05-05 14:35:00	3.77532	-4.49515	389.629
4	Ex	2019-05-06 14:29:00	6.6	-3.6	163.283
4	NED	2019-05-07 01:57:00	11.4023	-7.22908	377.942
4	Ex	2019-05-07 07:57:00	5.79112	-6.91499	600.545
4	NED	2019-05-08 21:32:00	6.02274	-6.54892	532.624
4	NED	2019-05-08 23:41:00	7.91044	-6.57896	435.414
4	Ex	2019-05-09 19:52:00	20.454	-20.1237	1520.29
4	NED	2019-05-09 20:56:00	17.0183	-21.692	1968.32
4	Er	2019-05-11 06:53:00	19.2432	-14.0668	835.046
4	NED	2019-05-11 20:08:00	13.5549	-6.28963	282.144
4	NED	2019-05-11 22:57:00	8.47175	-4.33038	184.28
4	Ex	2019-05-12 06:34:00	41.7752	-36.804	2551.88
4	Ex	2019-05-13 13:43:00	5	-9.26785	1049.53
4	Ex	2019-05-13 20:32:00	19.6593	-15.7022	1005.06
4	Ex	2019-05-14 10:26:00	28.2	-20	1156.35
4	NED	2019-05-16 04:08:00	16.2982	-6.1713	256.91
4	NED	2019-05-18 01:57:00	16.0715	-8.13908	343.175
4	NED	2019-05-18 03:11:00	11.6771	-8.64655	519.026
4	NED	2019-05-18 03:45:00	10.156	-5.97869	291.717
4	NED	2019-05-21 16:15:00	5.40792	-3.43678	180.07
4	NED	2019-05-22 03:59:00	6.96869	-3.80186	172.472
4	Ex	2019-05-22 08:36:00	5.96334	-5.43791	387.469
4	NED	2019-05-22 16:48:00	8.34263	-3.18652	132.654
4	NED	2019-05-22 18:09:00	3.58152	-3.25396	231.187
4	NED	2019-05-22 22:14:00	5.33113	-3.2241	161.346
4	NED	2019-05-22 23:25:00	6.05057	-4.15491	233.475
4	NED	2019-05-23 04:08:00	7.46756	-5.81025	363.817
4	NED	2019-05-23 04:16:00	7.95774	-5.53171	314.227
4	NED	2019-05-23 04:51:00	4.37692	-3.54979	230.12
4	NED	2019-05-23 05:33:00	10.4058	-8.13678	511.637
4	NED	2019-05-23 06:01:00	6.1028	-4.98235	324.758
4	Ex	2019-05-23 08:35:00	10.127	-7.39292	438.357
4	Er	2019-05-23 13:01:00	6.74039	-4.62502	259.712
4	NED	2019-05-26 02:52:00	8.00231	-6.15149	381.265
4	NED	2019-05-26 04:31:00	9.04268	-5.52037	278.694
4	NED	2019-05-26 05:42:00	9.05269	-5.68748	294.87
4	NED	2019-05-26 06:20:00	6.77511	-4.01262	196.907
4	NED	2019-06-03 10:12:00	9.68896	-5.54233	263.155
4	NED	2019-06-04 13:26:00	6.74745	-5.00888	301.321
4	NED	2019-06-04 18:34:00	9.32665	-5.05776	228.109
4	NED	2019-06-04 22:01:00	11.7638	-8.45868	494.983
4	NED	2019-06-05 02:39:00	6.95742	-4.15124	205.134
4	NED	2019-06-05 20:41:00	6.03148	-5.48637	390.159
4	NED	2019-06-06 19:06:00	10.1974	-3.33753	138.941
4	NED	2019-06-08 11:59:00	8.54068	-1.94078	80.7942
4	NED	2019-06-10 15:19:00	5.52563	-4.32665	272.371
4	Ex	2019-06-11 14:31:00	16.2705	-14.9466	1071.16
4	NED	2019-06-12 18:48:00	6.45823	-7.56273	648.061
4	NED	2019-06-13 06:49:00	5.09376	-1.98622	82.6859
4	Er	2019-06-13 09:21:00	3.38917	-2.99809	208.557
4	NED	2019-06-13 11:50:00	8.24667	-6.99889	470.916
4	NED	2019-06-14 15:05:00	12.7189	-3.25595	135.544
4	NED	2019-06-17 06:12:00	4.58067	-6.12716	573.696
4	NED	2019-06-18 08:59:00	6.05826	-6.08972	467.545
4	NED	2019-06-19 02:01:00	13.7941	-4.44401	185.003
4	NED	2019-06-19 22:19:00	13.1852	-8.31865	432.955
4	NED	2019-06-19 23:41:00	12.2473	-9.03971	541.13
4	NED	2019-06-20 00:56:00	11.0741	-9.37807	629.882
4	NED	2019-06-20 03:11:00	8.56327	-6.0693	350.712
4	NED	2019-06-20 07:10:00	7.59312	-4.87577	257.901
4	NED	2019-06-20 07:42:00	8.50661	-5.81433	325.37
4	NED	2019-06-20 08:42:00	9.29546	-7.43465	476.419
4	NED	2019-06-20 14:57:00	5.4074	-3.3495	171.4
4	NED	2019-06-20 19:28:00	8.33013	-6.22196	376.284
4	NED	2019-06-20 22:58:00	3.97458	-1.95134	81.2338
4	NED	2019-06-21 10:20:00	6.68126	-3.54775	156.754
4	NED	2019-06-21 14:47:00	9.54688	-5.99899	311.07
4	NED	2019-06-21 21:35:00	4.32396	-4.15336	308.104
4	NED	2019-06-22 03:14:00	6.26901	-3.63583	174.914
4	NED	2019-06-22 16:26:00	9.85369	-6.88505	392.889
4	NED	2019-06-23 07:04:00	6.17849	-1.947	81.0532
4	NED	2019-06-23 16:06:00	5.93361	-4.89739	322.103
4	Ex	2019-06-24 00:34:00	0.837766	-2.26361	305.322
4	NED	2019-06-24 01:38:00	6.99313	-5.14347	306.959
4	Er	2019-06-24 11:27:00	8.61216	-6.84515	436.357
4	Er	2019-06-24 12:58:00	7.01217	-4.97603	287.847
4	NED	2019-06-24 20:04:00	8.44192	-5.78739	324.726
4	NED	2019-06-25 15:14:00	7.15088	-3.66375	156.273
4	NED	2019-06-25 19:16:00	5.77317	-3.55969	181.382
4	NED	2019-06-25 20:07:00	4.40474	-2.71932	138.722
4	NED	2019-06-25 21:41:00	5.23592	-3.622	204.861
4	Ex	2019-06-27 17:15:00	-	-	-
4	NED	2019-06-30 15:41:00	56.5151	-54.8724	4104.08
4	NED	2019-07-01 16:32:00	3.62972	-4.38086	383.256
4	Ex	2019-07-01 16:37:00	3.62972	-4.38086	383.256
4	NED	2019-07-03 05:01:00	5.86045	-3.02131	129.666
4	Ex	2019-07-04 10:44:00	9.8901	-17.1447	1872.96
4	NED	2019-07-05 07:51:00	10.2976	-3.83922	159.826
4	NED	2019-07-05 10:13:00	7.05315	-4.88273	276.351
4	NED	2019-07-05 17:06:00	1.98445	-3.72736	425.039
4	NED	2019-07-09 07:09:00	8.88167	-4.286	178.425
4	NED	2019-07-11 22:29:00	6.57945	-2.36316	98.3778
4	NED	2019-07-13 17:44:00	5.72287	-5.89362	460.711
4	NED	2019-07-13 18:42:00	7.16184	-6.47278	457.982
4	NED	2019-07-16 00:45:00	16.3685	-11.5831	668.408
4	NED	2019-07-17 07:36:00	9.35951	-5.83868	300.736
4	NED	2019-07-17 15:55:00	9.37164	-6.30724	348.106
4	Ex	2019-07-19 03:55:00	9.6989	-8.00158	526.074
4	Ex	2019-07-20 02:10:00	11.2946	-8.76453	547.57
4	NED	2019-07-21 13:18:00	19.3938	-12.8088	695.06
4	NED	2019-07-21 14:10:00	7.24477	-2.77921	115.698
4	NED	2019-07-21 14:27:00	7.59069	-5.98987	379.535
4	NED	2019-07-21 14:58:00	5.41831	-5.53869	430.592
4	Ex	2019-07-22 02:50:00	28.97	-18.3906	962.609
4	NED	2019-07-22 03:39:00	7.97532	-4.34901	197.204
4	NED	2019-07-22 04:19:00	5.41025	-3.56334	192.877
4	Ex	2019-07-22 09:47:00	31.9588	-23.3994	1390.99
4	NED	2019-07-22 10:40:00	22.3518	-15.5285	881.641
4	NED	2019-07-23 16:27:00	6.00098	-5.62721	409.779
4	NED	2019-07-24 10:20:00	7.77317	-7.09914	506.446
4	Ex	2019-07-24 13:09:00	16.8753	-10.4667	536.249
4	NED	2019-07-24 14:31:00	7.85111	-5.21329	284.27
4	NED	2019-07-24 22:33:00	3.10054	-2.6044	173.771
4	NED	2019-07-25 11:22:00	7.78905	-3.27665	136.406
4	NED	2019-07-26 06:30:00	12.5574	-7.17559	340.36
4	NED	2019-07-26 19:35:00	5.1496	-3.59916	205.432
4	NED	2019-07-26 20:37:00	5.74554	-5.37862	391.167
4	NED	2019-07-26 22:05:00	5.36202	-4.88237	347.483
4	NED	2019-07-26 22:45:00	3.7126	-4.40134	380.365
4	Ex	2019-07-27 05:50:00	37.8856	-28.4924	1733.3
4	NED	2019-07-27 06:05:00	9.74996	-7.73809	492.672
4	Er	2019-07-27 06:58:00	19.9152	-12.9415	692.008
4	NED	2019-07-27 08:46:00	3.97238	-2.67529	147.744
4	NED	2019-07-28 02:00:00	10.6007	-6.33427	313.438
4	Ex	2019-07-28 17:25:00	42.0103	-34.7564	2290.41
4	Er	2019-07-28 17:54:00	43.4537	-29.935	1686.9
	NED	2019-07-29 20:05:00	1.71977	-1.24689	73.4946
	NED	2019-07-30 04:23:00	10.055	-5.83047	280.443
	NED	2019-07-30 05:37:00	9.49032	-5.6358	277.257
	NED	2019-07-30 18:43:00	4.80469	-3.0399	158.628
	NED	2019-07-30 19:50:00	2.87067	-4.8025	514.39
	NED	2019-08-01 00:20:00	4.72739	-3.57751	218.795
	NED	2019-08-01 14:59:00	7.3584	-3.78681	162.232
	NED	2019-08-03 06:56:00	4.37028	-3.91301	274.827
	NED	2019-08-03 08:28:00	5.7511	-2.59922	108.205
	NED	2019-08-03 11:00:00	6.95455	-3.68216	162.23
	NED	2019-08-03 22:31:00	5.46208	-2.7932	118.917
	NED	2019-08-03 23:07:00	5.21559	-3.88963	234.921
	NED	2019-08-03 23:46:00	7.76752	-4.47472	213.899
	NED	2019-08-04 00:21:00	7.35813	-4.49398	226.971
	NED	2019-08-04 06:11:00	6.77891	-3.18624	132.642
	NED	2019-08-04 06:44:00	8.0602	-5.15713	271.888
	NED	2019-08-04 07:30:00	4.19215	-4.26659	330.62
	NED	2019-08-04 09:52:00	9.74991	-6.17512	322.536
[truncated: 2,184 more rows]
